# Supplementary material for: Partitioning species and environmental diversity in fragmented landscapes: do the alpha, beta and gamma components match?
Source: Springer Nature journal article supplement (doi:10.1007/s10531-018-01691-7), 2019-01-04
Supplement: MOESM1 [file 16378392]

**Partitioning species and environmental diversity in fragmented landscapes- do the alpha, beta and gamma components match?**

Yoni Gavish; Itamar Giladi; Yaron Ziv

Contact: Yoni Gavish <gavishyoni@gmail.com>

**SUPPORTING INFORMATION**

**Online Resource 1:** Area, sampling habitat prey abundance and spider abundance of each patch

**Online Resource 2:** Additional results for patch cardinalities 3-9.

- Figure S1 – Spiders diversities against number of patches (univariate).
- Figure S2 – Spider diversities against habitat diversities (univariate).
- Figure S3 – Spider diversities against prey diversities (univariate).
- Figure S4 – Spider diversities against the area and connectivity variables (univariate).
- Figure S5 – Spider diversities against number of samples (univariate).
- Figure S6 – Variance partitioning for each of the 11 explanatory variables.
- Figure S7 – Variance partitioning aggregated according to thematic groups.
- Figure S8 – Variance partitioning aggregated according to scale.

**Online Resource 3:** Results of variance partitioning analyses in Dvir and Lachish, when permuting the dependent variables.

**Online Resource 4:** Results of variance partitioning analyses in Dvir.

**Online Resource 5:** Results of variance partitioning analyses in Lachish.

**Online Resource 1:** The area, number of samples, cover of each habitat and abundance of each spider species or prey group in each patch.

|  | Landscape | Dvir | | | | | | | | | | | | Lachish | | | | | | | | | | | |
| --- | --- | --- | --- | --- | --- | --- | --- | --- | --- | --- | --- | --- | --- | --- | --- | --- | --- | --- | --- | --- | --- | --- | --- | --- | --- |
| General | Patch ID | d34 | d59 | d102 | d31 | d57 | d93 | d118 | d66 | d15 | d89 | d80 | d98 | l40 | l43 | l65 | l30 | l22 | l63 | l9 | l19 | l39 | l45 | l35 | l24 |
| Sampling | Number of Samples | 7 | 7 | 7 | 7 | 7 | 12 | 12 | 12 | 12 | 25 | 25 | 25 | 7 | 7 | 7 | 7 | 7 | 12 | 12 | 12 | 12 | 25 | 25 | 25 |
| Area | Area (m^2) | 1097 | 1826 | 2203 | 2393 | 2458 | 3956 | 5733 | 6199 | 7378 | 20733 | 35268 | 38997 | 600 | 1007 | 1461 | 1693 | 2433 | 4906 | 5195 | 7916 | 8025 | 21591 | 22975 | 28084 |
| Habitat | Number of transects | 4 | 4 | 4 | 4 | 4 | 8 | 8 | 8 | 8 | 11 | 11 | 11 | 4 | 4 | 4 | 4 | 4 | 8 | 8 | 8 | 8 | 11 | 11 | 11 |
| Habitat | Exposed Soil | 579 | 357 | 482 | 481 | 403 | 1008 | 1048 | 794 | 923 | 1207 | 1133 | 1154 | 207 | 412 | 94 | 388 | 70 | 657 | 839 | 908 | 576 | 746 | 868 | 1093 |
| Habitat | Annual<15 | 8 | 8 | 2 | 0 | 0 | 1 | 0 | 4 | 4 | 2 | 2 | 6 | 128 | 9 | 34 | 58 | 109 | 103 | 16 | 12 | 25 | 119 | 28 | 53 |
| Habitat | Annual>15 | 7 | 8 | 0 | 6 | 0 | 5 | 0 | 6 | 1 | 1 | 0 | 2 | 180 | 2 | 388 | 18 | 259 | 80 | 16 | 23 | 55 | 25 | 6 | 8 |
| Habitat | Rosette | 4 | 0 | 6 | 7 | 15 | 10 | 9 | 20 | 24 | 12 | 33 | 31 | 0 | 1 | 0 | 5 | 0 | 21 | 0 | 4 | 0 | 47 | 18 | 16 |
| Habitat | Thistles | 8 | 5 | 10 | 2 | 41 | 14 | 15 | 33 | 174 | 1 | 11 | 47 | 47 | 102 | 103 | 65 | 149 | 127 | 246 | 145 | 241 | 47 | 95 | 233 |
| Habitat | Bush<35 | 30 | 55 | 74 | 34 | 44 | 115 | 146 | 68 | 112 | 243 | 256 | 145 | 29 | 71 | 14 | 59 | 53 | 237 | 120 | 61 | 77 | 193 | 203 | 92 |
| Habitat | Bush>35 | 0 | 0 | 0 | 9 | 36 | 40 | 0 | 0 | 0 | 26 | 86 | 89 | 0 | 0 | 0 | 0 | 0 | 0 | 0 | 0 | 0 | 0 | 0 | 0 |
| Habitat | Sarcopoterium spinosum | 0 | 203 | 0 | 94 | 0 | 13 | 0 | 299 | 0 | 187 | 16 | 137 | 0 | 0 | 0 | 8 | 0 | 0 | 0 | 14 | 243 | 74 | 147 | 52 |
| Habitat | Hyparrhenia hirta | 0 | 0 | 41 | 5 | 55 | 22 | 47 | 1 | 17 | 30 | 139 | 51 | 0 | 0 | 0 | 0 | 0 | 38 | 12 | 75 | 20 | 472 | 353 | 185 |
| Habitat | Rock | 4 | 4 | 25 | 2 | 46 | 52 | 15 | 55 | 25 | 51 | 84 | 98 | 49 | 43 | 7 | 39 | 0 | 17 | 31 | 38 | 43 | 37 | 42 | 28 |
| Spiders | AGELENIDAE Agelena s-1 | 0 | 2 | 0 | 0 | 1 | 0 | 0 | 3 | 0 | 5 | 1 | 0 | 0 | 0 | 0 | 0 | 0 | 0 | 0 | 0 | 0 | 0 | 0 | 0 |
| Spiders | ARANEIDAE Araneus s-1 | 1 | 0 | 0 | 0 | 0 | 0 | 0 | 0 | 0 | 0 | 0 | 0 | 0 | 1 | 0 | 0 | 1 | 0 | 0 | 0 | 0 | 0 | 0 | 0 |
| Spiders | ARANEIDAE Argiope lobata | 0 | 1 | 0 | 0 | 0 | 0 | 0 | 0 | 0 | 0 | 0 | 0 | 0 | 0 | 0 | 0 | 0 | 0 | 1 | 0 | 0 | 0 | 2 | 1 |
| Spiders | ARANEIDAE Glyptogona sextuberculata | 0 | 0 | 4 | 0 | 0 | 0 | 1 | 0 | 1 | 24 | 0 | 1 | 0 | 0 | 0 | 0 | 0 | 0 | 1 | 0 | 0 | 0 | 2 | 3 |
| Spiders | ARANEIDAE Hypsosinga s-1 | 0 | 0 | 0 | 0 | 0 | 0 | 0 | 0 | 4 | 0 | 0 | 1 | 0 | 0 | 3 | 5 | 0 | 5 | 7 | 2 | 0 | 4 | 5 | 5 |
| Spiders | ARANEIDAE Hypsosinga s-2 | 0 | 0 | 1 | 0 | 0 | 0 | 0 | 0 | 0 | 0 | 0 | 0 | 1 | 0 | 0 | 1 | 0 | 0 | 0 | 0 | 0 | 0 | 0 | 0 |
| Spiders | ARANEIDAE Hypsosinga s-3 | 0 | 0 | 0 | 0 | 0 | 0 | 0 | 0 | 0 | 0 | 0 | 0 | 0 | 0 | 0 | 0 | 1 | 0 | 0 | 0 | 0 | 0 | 0 | 0 |
| Spiders | ARANEIDAE m-1 | 0 | 0 | 0 | 0 | 0 | 0 | 0 | 0 | 0 | 0 | 0 | 0 | 0 | 0 | 0 | 0 | 0 | 0 | 0 | 0 | 0 | 0 | 1 | 0 |
| Spiders | ARANEIDAE Neoscona s-1 | 0 | 0 | 0 | 0 | 0 | 0 | 0 | 0 | 0 | 0 | 0 | 0 | 0 | 0 | 0 | 0 | 0 | 0 | 0 | 0 | 0 | 2 | 1 | 0 |
| Spiders | ARANEIDAE Neoscona s-2 | 0 | 0 | 1 | 0 | 0 | 0 | 0 | 0 | 0 | 0 | 0 | 0 | 0 | 0 | 0 | 0 | 0 | 0 | 0 | 0 | 0 | 0 | 0 | 0 |
| Spiders | ARANEIDAE Singa neta | 0 | 0 | 0 | 0 | 0 | 0 | 0 | 0 | 0 | 0 | 0 | 0 | 0 | 0 | 0 | 0 | 0 | 0 | 1 | 0 | 0 | 0 | 0 | 0 |
| Spiders | CLUBIONIDAE m-1 | 0 | 0 | 0 | 0 | 0 | 0 | 0 | 0 | 0 | 0 | 4 | 0 | 0 | 0 | 0 | 0 | 0 | 0 | 0 | 0 | 0 | 0 | 0 | 0 |
| Spiders | CLUBIONIDAE m-2 | 0 | 7 | 0 | 0 | 0 | 0 | 1 | 1 | 0 | 0 | 0 | 3 | 0 | 0 | 0 | 0 | 0 | 0 | 0 | 0 | 1 | 1 | 0 | 0 |
| Spiders | CLUBIONIDAE m-3 | 0 | 0 | 0 | 1 | 0 | 0 | 0 | 0 | 0 | 0 | 0 | 3 | 0 | 0 | 0 | 0 | 0 | 0 | 0 | 0 | 1 | 0 | 0 | 1 |
| Spiders | CORINNIDAE m-1 | 0 | 0 | 0 | 1 | 0 | 0 | 0 | 0 | 0 | 0 | 0 | 0 | 0 | 0 | 0 | 0 | 0 | 0 | 0 | 0 | 0 | 0 | 0 | 0 |
| Spiders | CORINNIDAE Trachelas minor | 0 | 0 | 0 | 0 | 0 | 0 | 0 | 0 | 0 | 0 | 0 | 0 | 0 | 0 | 0 | 0 | 0 | 0 | 0 | 0 | 1 | 4 | 5 | 0 |
| Spiders | DICTYNIDAE Dictyna s-1 | 0 | 0 | 0 | 1 | 2 | 3 | 0 | 3 | 0 | 0 | 1 | 5 | 19 | 22 | 1 | 20 | 1 | 0 | 22 | 2 | 57 | 24 | 51 | 24 |
| Spiders | DICTYNIDAE m-1 | 0 | 0 | 0 | 0 | 0 | 0 | 0 | 0 | 0 | 0 | 0 | 0 | 0 | 1 | 0 | 0 | 0 | 0 | 0 | 0 | 0 | 0 | 0 | 0 |
| Spiders | DICTYNIDAE m-2 | 0 | 0 | 0 | 0 | 1 | 0 | 0 | 0 | 0 | 0 | 1 | 0 | 0 | 1 | 0 | 1 | 1 | 1 | 1 | 0 | 1 | 6 | 8 | 1 |
| Spiders | FILISTATIDAE m-1 | 0 | 0 | 0 | 0 | 0 | 0 | 0 | 0 | 0 | 1 | 0 | 0 | 0 | 0 | 0 | 0 | 0 | 0 | 0 | 0 | 0 | 0 | 0 | 0 |
| Spiders | GNAPHOSIDAE Aphantaulax s-1 | 0 | 0 | 0 | 0 | 1 | 0 | 0 | 0 | 2 | 0 | 0 | 1 | 0 | 7 | 1 | 1 | 0 | 2 | 2 | 0 | 1 | 2 | 3 | 0 |
| Spiders | GNAPHOSIDAE Aphantaulax trifasciata | 0 | 0 | 0 | 0 | 0 | 0 | 0 | 0 | 0 | 0 | 0 | 0 | 0 | 0 | 0 | 0 | 0 | 0 | 0 | 0 | 0 | 1 | 0 | 0 |
| Spiders | GNAPHOSIDAE Leptodrassex s-1 | 0 | 0 | 0 | 0 | 0 | 0 | 0 | 0 | 0 | 0 | 0 | 0 | 0 | 0 | 0 | 0 | 0 | 0 | 0 | 1 | 0 | 0 | 0 | 0 |
| Spiders | GNAPHOSIDAE Leptodrassus s-1 | 0 | 0 | 0 | 0 | 0 | 0 | 0 | 0 | 0 | 0 | 5 | 1 | 0 | 0 | 0 | 0 | 0 | 0 | 0 | 0 | 1 | 1 | 0 | 0 |
| Spiders | GNAPHOSIDAE Leptodrassus s-2 | 0 | 0 | 0 | 0 | 0 | 0 | 0 | 0 | 0 | 0 | 0 | 1 | 0 | 0 | 0 | 0 | 0 | 0 | 0 | 0 | 0 | 0 | 0 | 0 |
| Spiders | GNAPHOSIDAE m-1 | 3 | 1 | 21 | 2 | 3 | 6 | 0 | 2 | 16 | 5 | 1 | 3 | 0 | 1 | 1 | 1 | 0 | 0 | 5 | 2 | 2 | 3 | 4 | 4 |
| Spiders | GNAPHOSIDAE Micaria ignea | 0 | 0 | 0 | 0 | 0 | 0 | 1 | 0 | 0 | 0 | 0 | 1 | 0 | 0 | 0 | 0 | 0 | 0 | 0 | 0 | 0 | 0 | 0 | 0 |
| Spiders | GNAPHOSIDAE Micaria s-1 | 0 | 0 | 2 | 0 | 1 | 0 | 2 | 1 | 0 | 1 | 0 | 1 | 0 | 0 | 0 | 0 | 0 | 0 | 1 | 0 | 0 | 0 | 0 | 0 |
| Spiders | GNAPHOSIDAE Minosia s-1 | 0 | 0 | 0 | 0 | 3 | 1 | 1 | 0 | 0 | 0 | 0 | 2 | 0 | 0 | 0 | 0 | 0 | 0 | 0 | 0 | 0 | 0 | 0 | 0 |
| Spiders | GNAPHOSIDAE Odontodrassus s-1 | 0 | 0 | 0 | 0 | 0 | 0 | 0 | 2 | 0 | 0 | 0 | 0 | 0 | 0 | 0 | 0 | 0 | 0 | 0 | 0 | 0 | 0 | 0 | 0 |
| Spiders | GNAPHOSIDAE Poecilochora s-1 | 0 | 0 | 0 | 0 | 0 | 0 | 0 | 0 | 0 | 1 | 2 | 0 | 0 | 0 | 0 | 0 | 0 | 0 | 0 | 0 | 0 | 0 | 0 | 1 |
| Spiders | GNAPHOSIDAE Poecilochora s-3 | 0 | 0 | 0 | 0 | 0 | 0 | 0 | 0 | 0 | 0 | 0 | 0 | 0 | 0 | 0 | 0 | 0 | 0 | 0 | 0 | 1 | 0 | 0 | 0 |
| Spiders | GNAPHOSIDAE Pterotricha s-1 | 0 | 0 | 0 | 0 | 0 | 0 | 0 | 0 | 1 | 0 | 0 | 0 | 0 | 0 | 0 | 0 | 0 | 0 | 0 | 0 | 0 | 0 | 0 | 0 |
| Spiders | GNAPHOSIDAE Scotophaeus s-1 | 0 | 0 | 0 | 0 | 0 | 0 | 0 | 0 | 0 | 0 | 0 | 0 | 0 | 0 | 0 | 0 | 0 | 0 | 1 | 0 | 0 | 0 | 0 | 0 |
| Spiders | GNAPHOSIDAE Trachyzelotes s-1 | 0 | 0 | 0 | 0 | 0 | 0 | 0 | 0 | 0 | 0 | 0 | 0 | 0 | 0 | 0 | 0 | 0 | 0 | 0 | 0 | 0 | 0 | 1 | 0 |
| Spiders | GNAPHOSIDAE Trachyzelotes s-2 | 0 | 0 | 0 | 0 | 0 | 0 | 0 | 1 | 0 | 0 | 0 | 0 | 0 | 0 | 0 | 0 | 0 | 0 | 0 | 0 | 0 | 0 | 1 | 0 |
| Spiders | GNAPHOSIDAE Zelotes nilicola | 0 | 0 | 0 | 0 | 0 | 1 | 0 | 0 | 0 | 0 | 0 | 0 | 0 | 0 | 0 | 0 | 0 | 0 | 0 | 0 | 0 | 0 | 0 | 0 |
| Spiders | GNAPHOSIDAE Zelotes scrutatus | 0 | 0 | 0 | 0 | 0 | 0 | 0 | 0 | 1 | 0 | 0 | 0 | 0 | 0 | 0 | 0 | 0 | 0 | 0 | 0 | 0 | 0 | 0 | 0 |
| Spiders | GNAPHOSIDAE Zelotes shaked | 0 | 0 | 0 | 0 | 0 | 1 | 0 | 0 | 0 | 0 | 0 | 1 | 0 | 0 | 0 | 0 | 0 | 0 | 0 | 0 | 0 | 0 | 0 | 0 |
| Spiders | GNAPHOSIDAE Zelotes soltitialis | 0 | 0 | 2 | 0 | 0 | 0 | 0 | 1 | 0 | 0 | 2 | 0 | 0 | 0 | 0 | 0 | 0 | 0 | 0 | 0 | 0 | 2 | 2 | 0 |
| Spiders | LIOCRANIDAE unidentified | 0 | 2 | 2 | 0 | 0 | 0 | 3 | 0 | 1 | 0 | 2 | 1 | 0 | 0 | 0 | 0 | 0 | 0 | 0 | 0 | 1 | 10 | 15 | 0 |
| Spiders | LYCOSIDAE unidentified | 0 | 0 | 3 | 0 | 1 | 1 | 3 | 5 | 0 | 8 | 24 | 10 | 2 | 1 | 0 | 0 | 1 | 0 | 2 | 0 | 2 | 2 | 11 | 1 |
| Spiders | MIMETIDAE Ero s-1 | 0 | 1 | 0 | 0 | 1 | 0 | 0 | 2 | 0 | 0 | 0 | 1 | 0 | 0 | 0 | 0 | 0 | 0 | 1 | 0 | 8 | 9 | 5 | 0 |
| Spiders | MIMETIDAE m-1 | 0 | 0 | 0 | 0 | 2 | 0 | 0 | 0 | 0 | 0 | 1 | 0 | 0 | 0 | 0 | 0 | 0 | 0 | 0 | 0 | 0 | 0 | 0 | 0 |
| Spiders | MIMETIDAE m-2 | 0 | 0 | 0 | 0 | 0 | 0 | 0 | 1 | 0 | 0 | 0 | 0 | 0 | 0 | 0 | 0 | 0 | 0 | 0 | 0 | 0 | 0 | 0 | 0 |
| Spiders | MITURGIDAE Cheiracanthium s-1 | 0 | 0 | 0 | 0 | 0 | 0 | 0 | 0 | 0 | 0 | 1 | 0 | 0 | 0 | 0 | 0 | 0 | 0 | 0 | 0 | 0 | 2 | 0 | 0 |
| Spiders | MITURGIDAE Cheiracanthium s-2 | 0 | 2 | 2 | 2 | 3 | 4 | 1 | 0 | 1 | 2 | 2 | 1 | 2 | 2 | 0 | 3 | 0 | 1 | 4 | 0 | 13 | 3 | 2 | 2 |
| Spiders | MITURGIDAE Prochora s-1 | 0 | 0 | 0 | 0 | 0 | 0 | 0 | 1 | 0 | 1 | 0 | 0 | 0 | 0 | 0 | 0 | 0 | 0 | 0 | 0 | 0 | 0 | 0 | 0 |
| Spiders | OONOPIDAE m-1 | 0 | 0 | 0 | 0 | 0 | 0 | 0 | 1 | 0 | 0 | 0 | 0 | 0 | 0 | 0 | 0 | 0 | 0 | 0 | 0 | 0 | 0 | 0 | 0 |
| Spiders | OONOPIDAE Oonops s-1 | 0 | 0 | 0 | 0 | 0 | 0 | 0 | 0 | 0 | 0 | 0 | 0 | 0 | 0 | 0 | 0 | 0 | 0 | 0 | 0 | 0 | 1 | 1 | 0 |
| Spiders | OONOPIDAE Opopaea punctata | 0 | 0 | 0 | 0 | 0 | 0 | 0 | 0 | 0 | 0 | 0 | 0 | 0 | 0 | 0 | 0 | 0 | 0 | 0 | 0 | 0 | 1 | 0 | 0 |
| Spiders | OONOPIDAE Orchestina pavesiiformis | 0 | 0 | 0 | 0 | 0 | 0 | 0 | 0 | 0 | 0 | 0 | 1 | 0 | 0 | 0 | 0 | 0 | 0 | 0 | 0 | 0 | 0 | 0 | 0 |
| Spiders | OXYOPIDAE m-1 | 0 | 0 | 0 | 0 | 0 | 0 | 0 | 0 | 0 | 0 | 0 | 0 | 0 | 0 | 0 | 0 | 0 | 0 | 1 | 0 | 0 | 0 | 0 | 0 |
| Spiders | OXYOPIDAE m-2 | 0 | 0 | 0 | 0 | 0 | 0 | 0 | 0 | 0 | 0 | 0 | 0 | 0 | 0 | 0 | 1 | 1 | 0 | 0 | 0 | 0 | 0 | 0 | 0 |
| Spiders | OXYOPIDAE m-3 | 0 | 0 | 1 | 0 | 0 | 0 | 0 | 0 | 0 | 0 | 0 | 0 | 0 | 22 | 0 | 2 | 3 | 0 | 3 | 0 | 11 | 0 | 2 | 1 |
| Spiders | OXYOPIDAE Oxyopes s-1 | 0 | 0 | 0 | 0 | 0 | 0 | 0 | 0 | 0 | 0 | 0 | 0 | 2 | 1 | 0 | 7 | 4 | 0 | 0 | 0 | 5 | 2 | 6 | 4 |
| Spiders | OXYOPIDAE Oxyopes sobrinus | 0 | 0 | 0 | 0 | 0 | 0 | 0 | 0 | 0 | 0 | 0 | 0 | 0 | 0 | 0 | 0 | 0 | 0 | 0 | 0 | 0 | 0 | 0 | 1 |
| Spiders | PALPIMANIDAE Palpimanus s-1 | 0 | 0 | 0 | 0 | 0 | 0 | 0 | 0 | 1 | 1 | 0 | 1 | 0 | 0 | 0 | 0 | 0 | 0 | 0 | 0 | 0 | 2 | 0 | 0 |
| Spiders | PHILODROMIDAE Philodromus s-1 | 1 | 20 | 21 | 1 | 29 | 9 | 26 | 16 | 15 | 58 | 62 | 68 | 10 | 168 | 28 | 106 | 18 | 20 | 171 | 20 | 35 | 71 | 64 | 91 |
| Spiders | PHILODROMIDAE Philodromus s-2 | 0 | 0 | 0 | 0 | 0 | 0 | 1 | 3 | 8 | 4 | 4 | 2 | 0 | 0 | 1 | 0 | 0 | 2 | 0 | 4 | 3 | 0 | 1 | 9 |
| Spiders | PHILODROMIDAE Philodromus s-5 | 0 | 0 | 0 | 0 | 0 | 0 | 0 | 0 | 0 | 0 | 0 | 0 | 0 | 0 | 0 | 0 | 0 | 0 | 0 | 1 | 0 | 0 | 0 | 0 |
| Spiders | PHILODROMIDAE Thanatus fabricii | 0 | 0 | 0 | 0 | 0 | 0 | 0 | 0 | 0 | 0 | 0 | 1 | 0 | 0 | 0 | 0 | 0 | 0 | 0 | 0 | 0 | 0 | 0 | 2 |
| Spiders | PHILODROMIDAE Thanatus s-1 | 4 | 9 | 36 | 7 | 39 | 13 | 34 | 21 | 5 | 53 | 63 | 43 | 4 | 30 | 24 | 26 | 39 | 17 | 35 | 7 | 26 | 69 | 41 | 35 |
| Spiders | PHILODROMIDAE Thanatus s-2 | 0 | 0 | 0 | 0 | 1 | 0 | 0 | 1 | 0 | 5 | 8 | 9 | 0 | 0 | 0 | 1 | 0 | 0 | 0 | 0 | 0 | 3 | 3 | 5 |
| Spiders | PHILODROMIDAE Thanatus s-3 | 0 | 0 | 0 | 0 | 0 | 0 | 1 | 0 | 0 | 0 | 0 | 0 | 0 | 0 | 0 | 0 | 0 | 0 | 0 | 0 | 0 | 0 | 0 | 0 |
| Spiders | PHILODROMIDAE Thanatus vulgaris | 0 | 0 | 0 | 0 | 0 | 0 | 0 | 0 | 1 | 0 | 0 | 0 | 0 | 0 | 0 | 0 | 0 | 0 | 0 | 0 | 0 | 0 | 0 | 0 |
| Spiders | PHOLCIDAE Pholcus s-1 | 0 | 0 | 1 | 0 | 0 | 0 | 0 | 1 | 0 | 2 | 2 | 0 | 0 | 0 | 0 | 0 | 0 | 0 | 0 | 0 | 1 | 0 | 1 | 0 |
| Spiders | PISAURIDAE Rothus s-1 | 0 | 4 | 0 | 1 | 0 | 0 | 0 | 0 | 0 | 1 | 0 | 0 | 0 | 0 | 0 | 0 | 0 | 0 | 0 | 0 | 0 | 0 | 0 | 0 |
| Spiders | PISAURIDAE Rothus s-2 | 0 | 0 | 0 | 0 | 0 | 0 | 0 | 0 | 0 | 0 | 0 | 0 | 0 | 0 | 0 | 0 | 0 | 0 | 0 | 0 | 1 | 0 | 0 | 0 |
| Spiders | PISAURIDAE unidentified | 0 | 0 | 0 | 0 | 0 | 0 | 0 | 0 | 0 | 0 | 0 | 2 | 0 | 0 | 0 | 0 | 0 | 0 | 0 | 0 | 0 | 0 | 0 | 0 |
| Spiders | PRODIDOMIDAE m-1 | 0 | 0 | 0 | 0 | 0 | 0 | 0 | 1 | 0 | 0 | 1 | 0 | 0 | 0 | 0 | 0 | 0 | 0 | 0 | 0 | 0 | 0 | 0 | 0 |
| Spiders | SALTICIDAE Aelurillus politiventris | 0 | 0 | 0 | 0 | 0 | 0 | 1 | 0 | 0 | 0 | 0 | 0 | 0 | 0 | 0 | 0 | 0 | 0 | 0 | 0 | 0 | 0 | 0 | 0 |
| Spiders | SALTICIDAE Aelurillus s-1 | 0 | 0 | 0 | 0 | 0 | 1 | 0 | 0 | 0 | 0 | 0 | 0 | 0 | 0 | 0 | 0 | 0 | 0 | 0 | 0 | 0 | 0 | 0 | 0 |
| Spiders | SALTICIDAE agelena s-1 | 0 | 1 | 0 | 0 | 0 | 0 | 0 | 0 | 0 | 0 | 0 | 0 | 0 | 0 | 0 | 0 | 0 | 0 | 0 | 0 | 0 | 0 | 0 | 0 |
| Spiders | SALTICIDAE Ballus s-1 | 0 | 0 | 0 | 0 | 0 | 0 | 0 | 0 | 0 | 0 | 0 | 0 | 0 | 0 | 0 | 0 | 0 | 0 | 0 | 0 | 0 | 5 | 2 | 0 |
| Spiders | SALTICIDAE Cyrba algerina | 0 | 0 | 0 | 0 | 0 | 0 | 0 | 0 | 0 | 0 | 0 | 1 | 0 | 0 | 0 | 0 | 0 | 0 | 0 | 0 | 0 | 0 | 0 | 0 |
| Spiders | SALTICIDAE Euophrys s-1 | 8 | 11 | 32 | 22 | 12 | 10 | 20 | 14 | 25 | 36 | 15 | 50 | 25 | 26 | 10 | 13 | 8 | 14 | 64 | 6 | 73 | 217 | 190 | 40 |
| Spiders | SALTICIDAE Euophrys s-2 | 0 | 0 | 0 | 0 | 0 | 0 | 0 | 0 | 0 | 1 | 0 | 0 | 0 | 0 | 0 | 0 | 0 | 0 | 0 | 0 | 0 | 0 | 0 | 0 |
| Spiders | SALTICIDAE Euryopis s-1 | 0 | 0 | 0 | 0 | 0 | 0 | 0 | 0 | 0 | 0 | 0 | 0 | 0 | 0 | 0 | 0 | 0 | 0 | 0 | 0 | 0 | 0 | 0 | 1 |
| Spiders | SALTICIDAE Evarcha s-1 | 0 | 0 | 0 | 0 | 3 | 1 | 0 | 1 | 3 | 0 | 0 | 1 | 0 | 0 | 0 | 0 | 0 | 2 | 0 | 1 | 0 | 0 | 0 | 1 |
| Spiders | SALTICIDAE Heliophanus s-1 | 0 | 0 | 1 | 0 | 0 | 0 | 0 | 0 | 0 | 0 | 0 | 0 | 0 | 0 | 4 | 0 | 0 | 1 | 3 | 0 | 0 | 0 | 0 | 0 |
| Spiders | SALTICIDAE Langona s-1 | 0 | 0 | 0 | 0 | 0 | 0 | 0 | 0 | 0 | 0 | 0 | 1 | 0 | 0 | 0 | 0 | 0 | 0 | 0 | 0 | 0 | 0 | 0 | 0 |
| Spiders | SALTICIDAE Longona s-1 | 0 | 0 | 0 | 0 | 0 | 0 | 0 | 0 | 0 | 0 | 0 | 0 | 0 | 0 | 0 | 0 | 0 | 0 | 0 | 0 | 0 | 0 | 1 | 0 |
| Spiders | SALTICIDAE m-1 | 0 | 0 | 0 | 0 | 0 | 0 | 0 | 0 | 0 | 0 | 2 | 1 | 0 | 0 | 0 | 0 | 0 | 0 | 0 | 0 | 1 | 0 | 0 | 0 |
| Spiders | SALTICIDAE m-10 | 0 | 0 | 2 | 0 | 0 | 0 | 0 | 0 | 0 | 0 | 2 | 3 | 0 | 0 | 0 | 0 | 0 | 0 | 0 | 1 | 1 | 0 | 0 | 3 |
| Spiders | SALTICIDAE m-11 | 0 | 0 | 2 | 1 | 0 | 1 | 1 | 2 | 0 | 7 | 0 | 1 | 0 | 0 | 1 | 2 | 5 | 0 | 0 | 1 | 0 | 2 | 2 | 3 |
| Spiders | SALTICIDAE m-12 | 0 | 0 | 0 | 0 | 0 | 0 | 0 | 1 | 0 | 0 | 0 | 0 | 0 | 2 | 0 | 0 | 2 | 1 | 0 | 0 | 0 | 0 | 0 | 0 |
| Spiders | SALTICIDAE m-13 | 0 | 0 | 0 | 0 | 1 | 0 | 2 | 0 | 0 | 0 | 0 | 0 | 0 | 0 | 0 | 0 | 0 | 1 | 0 | 0 | 0 | 0 | 0 | 0 |
| Spiders | SALTICIDAE m-2 | 0 | 0 | 0 | 0 | 0 | 0 | 0 | 0 | 0 | 0 | 0 | 0 | 0 | 0 | 0 | 0 | 0 | 1 | 0 | 0 | 0 | 0 | 0 | 0 |
| Spiders | SALTICIDAE m-3 | 0 | 0 | 0 | 0 | 0 | 0 | 0 | 0 | 0 | 0 | 0 | 0 | 0 | 1 | 0 | 0 | 0 | 0 | 0 | 0 | 0 | 3 | 1 | 0 |
| Spiders | SALTICIDAE m-4 | 0 | 1 | 1 | 0 | 5 | 0 | 6 | 1 | 0 | 4 | 5 | 1 | 0 | 0 | 0 | 1 | 0 | 0 | 0 | 1 | 2 | 0 | 0 | 3 |
| Spiders | SALTICIDAE m-5 | 0 | 1 | 0 | 0 | 0 | 0 | 0 | 0 | 0 | 0 | 2 | 3 | 0 | 0 | 0 | 1 | 1 | 0 | 0 | 1 | 1 | 0 | 1 | 0 |
| Spiders | SALTICIDAE m-6 | 1 | 3 | 1 | 2 | 1 | 6 | 1 | 14 | 4 | 16 | 14 | 16 | 2 | 4 | 7 | 4 | 4 | 4 | 9 | 2 | 4 | 2 | 1 | 7 |
| Spiders | SALTICIDAE m-8 | 0 | 0 | 0 | 0 | 0 | 0 | 0 | 0 | 0 | 1 | 0 | 0 | 0 | 0 | 0 | 0 | 2 | 2 | 3 | 0 | 0 | 0 | 0 | 0 |
| Spiders | SALTICIDAE m-9 | 0 | 0 | 0 | 0 | 0 | 0 | 0 | 0 | 1 | 0 | 0 | 1 | 1 | 1 | 2 | 1 | 9 | 0 | 7 | 0 | 0 | 4 | 1 | 1 |
| Spiders | SALTICIDAE Mogrus neglectus | 0 | 0 | 0 | 0 | 0 | 0 | 2 | 0 | 1 | 2 | 0 | 1 | 2 | 0 | 0 | 0 | 0 | 0 | 1 | 1 | 2 | 0 | 0 | 3 |
| Spiders | SALTICIDAE Mogrus s-1 | 0 | 0 | 0 | 0 | 0 | 0 | 0 | 0 | 0 | 0 | 0 | 0 | 0 | 0 | 0 | 0 | 0 | 0 | 0 | 0 | 0 | 0 | 0 | 1 |
| Spiders | SALTICIDAE Pellenes moderianus | 0 | 0 | 1 | 1 | 1 | 1 | 0 | 0 | 2 | 0 | 0 | 1 | 1 | 0 | 2 | 1 | 3 | 4 | 0 | 0 | 2 | 2 | 0 | 0 |
| Spiders | SALTICIDAE Pellenes s-2 | 0 | 0 | 0 | 0 | 0 | 0 | 0 | 0 | 0 | 0 | 0 | 0 | 0 | 0 | 1 | 0 | 0 | 0 | 0 | 0 | 0 | 0 | 1 | 2 |
| Spiders | SALTICIDAE Phlegra particeps | 0 | 0 | 0 | 0 | 0 | 0 | 0 | 0 | 0 | 0 | 0 | 1 | 0 | 0 | 0 | 0 | 0 | 0 | 0 | 0 | 0 | 0 | 0 | 0 |
| Spiders | SALTICIDAE Phlegra s-1 | 1 | 0 | 3 | 2 | 0 | 0 | 0 | 1 | 0 | 2 | 1 | 4 | 0 | 1 | 1 | 1 | 1 | 1 | 4 | 0 | 6 | 3 | 1 | 0 |
| Spiders | SALTICIDAE Pseudicius s-1 | 1 | 0 | 0 | 0 | 1 | 0 | 0 | 1 | 0 | 0 | 0 | 1 | 0 | 0 | 0 | 1 | 0 | 0 | 0 | 0 | 0 | 1 | 7 | 0 |
| Spiders | SALTICIDAE Salticus s-1 | 0 | 3 | 8 | 0 | 2 | 0 | 0 | 3 | 2 | 4 | 7 | 10 | 0 | 4 | 1 | 3 | 1 | 4 | 7 | 2 | 3 | 6 | 11 | 6 |
| Spiders | SPARASSIDAE Micrommata s-1 | 3 | 6 | 9 | 2 | 4 | 7 | 5 | 3 | 8 | 28 | 18 | 20 | 0 | 2 | 2 | 8 | 3 | 2 | 17 | 4 | 4 | 25 | 27 | 9 |
| Spiders | SYNAPHRIDAE Synaphris s-1 | 0 | 0 | 0 | 0 | 0 | 0 | 1 | 0 | 0 | 0 | 0 | 1 | 0 | 0 | 0 | 0 | 0 | 0 | 1 | 0 | 0 | 0 | 1 | 2 |
| Spiders | THERIDIIDAE Euryopis acuminata | 0 | 0 | 0 | 0 | 0 | 0 | 0 | 0 | 0 | 0 | 0 | 0 | 0 | 0 | 0 | 0 | 0 | 0 | 0 | 0 | 0 | 0 | 1 | 0 |
| Spiders | THERIDIIDAE Kochiura aulica | 0 | 0 | 0 | 0 | 0 | 0 | 0 | 0 | 0 | 0 | 0 | 0 | 0 | 0 | 1 | 0 | 0 | 0 | 0 | 0 | 1 | 0 | 0 | 0 |
| Spiders | THERIDIIDAE kochiura s-1 | 11 | 0 | 8 | 0 | 0 | 0 | 0 | 6 | 1 | 0 | 0 | 7 | 0 | 0 | 10 | 17 | 3 | 12 | 19 | 1 | 7 | 3 | 12 | 18 |
| Spiders | THERIDIIDAE Latrodectus pallidus | 0 | 0 | 0 | 0 | 2 | 0 | 0 | 0 | 0 | 0 | 0 | 0 | 0 | 0 | 0 | 0 | 0 | 0 | 0 | 0 | 0 | 0 | 0 | 0 |
| Spiders | THERIDIIDAE m-1 | 0 | 0 | 0 | 0 | 0 | 0 | 0 | 0 | 1 | 0 | 0 | 1 | 0 | 0 | 0 | 0 | 0 | 1 | 0 | 0 | 1 | 0 | 3 | 1 |
| Spiders | THERIDIIDAE m-2 | 0 | 2 | 0 | 0 | 0 | 1 | 0 | 0 | 0 | 1 | 1 | 0 | 0 | 1 | 0 | 3 | 1 | 0 | 7 | 2 | 1 | 22 | 23 | 4 |
| Spiders | THERIDIIDAE m-4 | 0 | 0 | 6 | 0 | 0 | 0 | 0 | 3 | 0 | 0 | 0 | 0 | 0 | 0 | 0 | 0 | 0 | 0 | 0 | 0 | 0 | 25 | 16 | 2 |
| Spiders | THERIDIIDAE m-5 | 0 | 1 | 0 | 0 | 0 | 0 | 0 | 0 | 0 | 0 | 0 | 0 | 2 | 58 | 0 | 0 | 0 | 0 | 0 | 0 | 90 | 1 | 3 | 0 |
| Spiders | THERIDIIDAE theridion agaricographum | 0 | 0 | 0 | 0 | 0 | 0 | 0 | 0 | 0 | 0 | 0 | 0 | 0 | 0 | 0 | 1 | 0 | 0 | 0 | 0 | 4 | 1 | 0 | 1 |
| Spiders | THERIDIIDAE theridion musivum | 0 | 0 | 0 | 0 | 1 | 0 | 6 | 1 | 0 | 1 | 2 | 0 | 0 | 0 | 0 | 0 | 0 | 0 | 0 | 0 | 0 | 1 | 1 | 0 |
| Spiders | THERIDIIDAE theridion negebense | 0 | 0 | 0 | 0 | 0 | 0 | 0 | 0 | 0 | 0 | 0 | 0 | 0 | 0 | 0 | 0 | 0 | 0 | 0 | 0 | 1 | 2 | 1 | 0 |
| Spiders | THERIDIIDAE theridion s-2 | 0 | 1 | 0 | 0 | 0 | 0 | 0 | 0 | 0 | 0 | 0 | 0 | 0 | 0 | 0 | 1 | 4 | 0 | 5 | 0 | 1 | 20 | 13 | 0 |
| Spiders | THOMISIDAE Heriaeus s-1 | 0 | 2 | 0 | 0 | 0 | 2 | 0 | 4 | 0 | 26 | 6 | 10 | 0 | 0 | 0 | 15 | 0 | 0 | 18 | 6 | 6 | 11 | 15 | 4 |
| Spiders | THOMISIDAE m-1 | 0 | 0 | 0 | 0 | 0 | 0 | 0 | 1 | 0 | 0 | 0 | 0 | 1 | 0 | 0 | 0 | 0 | 0 | 0 | 0 | 0 | 0 | 0 | 0 |
| Spiders | THOMISIDAE Monaeses israeliensis | 1 | 1 | 8 | 0 | 2 | 0 | 6 | 5 | 6 | 8 | 18 | 5 | 2 | 9 | 1 | 8 | 2 | 14 | 7 | 8 | 9 | 23 | 16 | 55 |
| Spiders | THOMISIDAE Ozyptila s-1 | 0 | 3 | 0 | 0 | 0 | 2 | 0 | 0 | 1 | 2 | 1 | 1 | 0 | 0 | 0 | 0 | 0 | 1 | 0 | 0 | 1 | 0 | 1 | 0 |
| Spiders | THOMISIDAE Ozyptila s-2 | 0 | 0 | 0 | 1 | 1 | 1 | 1 | 1 | 0 | 3 | 1 | 0 | 0 | 1 | 0 | 7 | 0 | 1 | 4 | 3 | 4 | 8 | 13 | 8 |
| Spiders | THOMISIDAE Ozyptila s-3 | 0 | 0 | 0 | 0 | 0 | 0 | 0 | 0 | 0 | 0 | 0 | 1 | 0 | 0 | 0 | 0 | 0 | 0 | 0 | 0 | 0 | 0 | 0 | 0 |
| Spiders | THOMISIDAE Runcinia s-1 | 0 | 0 | 0 | 0 | 0 | 0 | 0 | 0 | 0 | 0 | 0 | 0 | 0 | 0 | 0 | 1 | 0 | 0 | 0 | 0 | 0 | 0 | 0 | 0 |
| Spiders | THOMISIDAE Synaema s-3 | 0 | 0 | 0 | 0 | 0 | 0 | 0 | 0 | 0 | 0 | 0 | 0 | 0 | 0 | 0 | 1 | 0 | 0 | 0 | 0 | 0 | 0 | 0 | 0 |
| Spiders | THOMISIDAE Thomisus onustus | 0 | 0 | 0 | 0 | 0 | 0 | 0 | 1 | 0 | 0 | 0 | 0 | 1 | 2 | 0 | 0 | 0 | 1 | 3 | 0 | 0 | 0 | 0 | 0 |
| Spiders | THOMISIDAE Thomisus s-1 | 5 | 0 | 1 | 0 | 0 | 1 | 0 | 3 | 3 | 3 | 1 | 1 | 0 | 6 | 1 | 3 | 3 | 6 | 6 | 0 | 5 | 0 | 1 | 1 |
| Spiders | THOMISIDAE Xysticus s-1 | 0 | 0 | 0 | 0 | 0 | 0 | 0 | 3 | 0 | 2 | 6 | 6 | 0 | 0 | 1 | 0 | 0 | 0 | 0 | 0 | 0 | 0 | 0 | 0 |
| Spiders | THOMISIDAE Xysticus s-2 | 0 | 1 | 0 | 0 | 0 | 0 | 1 | 0 | 0 | 0 | 4 | 0 | 0 | 1 | 1 | 8 | 0 | 0 | 0 | 0 | 6 | 15 | 14 | 0 |
| Spiders | THOMISIDAE Xysticus s-3 | 0 | 0 | 0 | 2 | 2 | 1 | 11 | 8 | 8 | 16 | 39 | 5 | 0 | 0 | 0 | 0 | 0 | 0 | 3 | 0 | 0 | 0 | 0 | 2 |
| Spiders | THOMISIDAE Xysticus s-4 | 0 | 0 | 0 | 0 | 0 | 0 | 0 | 0 | 0 | 0 | 1 | 0 | 0 | 0 | 0 | 0 | 0 | 0 | 0 | 0 | 0 | 2 | 0 | 0 |
| Spiders | THOMISIDAE Xysticus s-5 | 0 | 1 | 0 | 0 | 0 | 0 | 1 | 0 | 0 | 0 | 2 | 0 | 0 | 0 | 3 | 0 | 0 | 0 | 0 | 0 | 0 | 0 | 2 | 0 |
| Spiders | THOMISIDAE Xysticus s-7 | 0 | 0 | 0 | 0 | 0 | 0 | 0 | 0 | 0 | 0 | 0 | 0 | 0 | 0 | 0 | 1 | 0 | 1 | 0 | 2 | 0 | 0 | 1 | 0 |
| Spiders | u-3 | 0 | 0 | 0 | 0 | 0 | 1 | 0 | 0 | 0 | 6 | 0 | 0 | 0 | 1 | 0 | 1 | 0 | 0 | 0 | 0 | 1 | 0 | 1 | 0 |
| Spiders | u-4 | 0 | 0 | 0 | 0 | 0 | 0 | 1 | 0 | 0 | 1 | 0 | 0 | 0 | 0 | 0 | 0 | 0 | 0 | 0 | 0 | 0 | 0 | 0 | 0 |
| Spiders | u-8 | 0 | 0 | 0 | 0 | 0 | 0 | 0 | 0 | 0 | 0 | 0 | 0 | 0 | 0 | 0 | 2 | 0 | 0 | 0 | 0 | 0 | 0 | 0 | 0 |
| Spiders | ULOBORIDAE Uloborus s-1 | 0 | 0 | 2 | 0 | 0 | 0 | 0 | 1 | 0 | 0 | 0 | 0 | 0 | 1 | 0 | 0 | 0 | 0 | 0 | 0 | 1 | 1 | 0 | 1 |
| Spiders | ULOBORIDAE Uloborus walckenaerius | 0 | 0 | 0 | 0 | 0 | 0 | 0 | 0 | 0 | 0 | 0 | 0 | 0 | 1 | 1 | 0 | 0 | 0 | 1 | 0 | 0 | 0 | 0 | 0 |
| Spiders | ZODARIIDAE Lachesana s-1 | 0 | 0 | 0 | 0 | 0 | 0 | 0 | 0 | 0 | 1 | 0 | 0 | 0 | 0 | 0 | 0 | 0 | 0 | 0 | 0 | 0 | 0 | 0 | 0 |
| Spiders | ZODARIIDAE Palaestina expolita | 1 | 0 | 0 | 0 | 0 | 0 | 0 | 0 | 0 | 0 | 0 | 2 | 0 | 0 | 0 | 0 | 0 | 0 | 1 | 0 | 0 | 0 | 0 | 0 |
| Spiders | ZODARIIDAE Pax s-1 | 0 | 0 | 0 | 0 | 0 | 0 | 0 | 0 | 0 | 0 | 0 | 0 | 0 | 1 | 0 | 1 | 0 | 0 | 0 | 0 | 0 | 0 | 0 | 0 |
| Spiders | ZODARIIDAE Ranops expers | 0 | 2 | 2 | 0 | 1 | 0 | 0 | 0 | 0 | 0 | 5 | 0 | 0 | 0 | 0 | 0 | 0 | 0 | 0 | 0 | 1 | 0 | 0 | 0 |
| Spiders | ZODARIIDAE Trygetus s-1 | 0 | 0 | 0 | 0 | 0 | 0 | 0 | 0 | 0 | 2 | 1 | 0 | 0 | 0 | 0 | 0 | 0 | 1 | 0 | 0 | 0 | 1 | 0 | 0 |
| Spiders | ZODARIIDAE Trygetus sexoculatus | 0 | 0 | 0 | 0 | 1 | 0 | 0 | 0 | 0 | 0 | 0 | 0 | 0 | 0 | 0 | 0 | 0 | 0 | 0 | 0 | 0 | 0 | 0 | 0 |
| Spiders | ZODARIIDAE Zodarion lutipus | 0 | 0 | 0 | 0 | 0 | 1 | 0 | 0 | 0 | 3 | 0 | 0 | 0 | 3 | 0 | 1 | 0 | 0 | 4 | 0 | 2 | 0 | 1 | 1 |
| Spiders | ZODARIIDAE Zodarion nitidum | 0 | 0 | 0 | 0 | 0 | 0 | 0 | 0 | 0 | 1 | 0 | 0 | 0 | 0 | 0 | 0 | 0 | 0 | 0 | 3 | 0 | 0 | 3 | 0 |
| Spiders | ZODARIIDAE Zodarion s-1 | 0 | 1 | 0 | 0 | 2 | 2 | 0 | 3 | 1 | 1 | 0 | 3 | 0 | 0 | 0 | 0 | 0 | 0 | 2 | 1 | 0 | 0 | 0 | 0 |
| Spiders | ZODARIIDAE Zodarion s-2 | 0 | 1 | 0 | 0 | 0 | 0 | 0 | 0 | 0 | 0 | 0 | 1 | 0 | 0 | 0 | 0 | 0 | 1 | 0 | 0 | 0 | 0 | 1 | 0 |
| Spiders | ZORIDAE m-1 | 0 | 0 | 8 | 0 | 1 | 4 | 1 | 0 | 6 | 1 | 1 | 1 | 0 | 3 | 0 | 2 | 0 | 0 | 7 | 0 | 3 | 14 | 12 | 1 |
| Spiders | ZORIDAE m-2 | 0 | 0 | 0 | 1 | 0 | 0 | 0 | 0 | 0 | 0 | 0 | 0 | 0 | 0 | 0 | 0 | 1 | 0 | 1 | 0 | 0 | 11 | 8 | 0 |
| Prey | Acari | 0 | 11 | 2 | 2 | 7 | 4 | 2 | 9 | 9 | 11 | 20 | 16 | 0 | 4 | 0 | 3 | 3 | 1 | 12 | 2 | 13 | 7 | 26 | 7 |
| Prey | Ants | 90 | 111 | 217 | 1 | 94 | 34 | 64 | 431 | 229 | 689 | 969 | 111 | 23 | 103 | 52 | 19 | 26 | 162 | 116 | 56 | 138 | 816 | 440 | 300 |
| Prey | Blattodea | 0 | 0 | 20 | 0 | 25 | 3 | 29 | 2 | 4 | 90 | 209 | 19 | 0 | 4 | 0 | 3 | 0 | 14 | 34 | 2 | 0 | 323 | 194 | 28 |
| Prey | Coleoptera | 7 | 63 | 104 | 4 | 11 | 7 | 10 | 20 | 8 | 80 | 151 | 61 | 0 | 17 | 9 | 9 | 18 | 28 | 29 | 10 | 19 | 108 | 124 | 59 |
| Prey | Collembula | 0 | 0 | 0 | 0 | 1 | 0 | 0 | 0 | 0 | 0 | 0 | 0 | 0 | 0 | 0 | 0 | 0 | 0 | 0 | 0 | 0 | 0 | 0 | 0 |
| Prey | Dermaptera | 0 | 0 | 0 | 0 | 0 | 0 | 0 | 0 | 0 | 0 | 0 | 0 | 0 | 0 | 0 | 0 | 0 | 0 | 0 | 0 | 0 | 0 | 2 | 0 |
| Prey | Diptera | 0 | 0 | 0 | 0 | 0 | 0 | 0 | 0 | 0 | 0 | 1 | 1 | 0 | 0 | 2 | 0 | 1 | 1 | 1 | 1 | 0 | 1 | 1 | 11 |
| Prey | Heteroptera | 0 | 8 | 13 | 4 | 89 | 2 | 7 | 25 | 3 | 31 | 32 | 50 | 4 | 13 | 7 | 5 | 2 | 26 | 15 | 5 | 31 | 119 | 132 | 74 |
| Prey | Homoptera | 3 | 23 | 21 | 1 | 10 | 5 | 15 | 60 | 8 | 73 | 57 | 47 | 11 | 259 | 3 | 11 | 6 | 41 | 100 | 159 | 29 | 61 | 73 | 285 |
| Prey | Isopods | 0 | 2 | 1 | 2 | 0 | 7 | 4 | 13 | 4 | 15 | 21 | 17 | 0 | 0 | 0 | 0 | 0 | 0 | 0 | 0 | 0 | 1 | 4 | 2 |
| Prey | Isoptera | 0 | 43 | 20 | 0 | 0 | 0 | 0 | 0 | 0 | 0 | 15 | 0 | 0 | 0 | 0 | 0 | 0 | 0 | 0 | 0 | 0 | 0 | 0 | 0 |
| Prey | Lepidoptera | 0 | 0 | 2 | 0 | 0 | 2 | 1 | 2 | 1 | 1 | 4 | 2 | 0 | 0 | 0 | 1 | 1 | 0 | 2 | 0 | 2 | 0 | 5 | 1 |
| Prey | Mantodea | 0 | 4 | 0 | 1 | 2 | 1 | 1 | 2 | 4 | 2 | 0 | 6 | 0 | 3 | 1 | 0 | 0 | 2 | 5 | 0 | 1 | 1 | 10 | 8 |
| Prey | Myriapoda | 0 | 0 | 0 | 0 | 0 | 0 | 0 | 0 | 0 | 0 | 0 | 0 | 0 | 0 | 0 | 0 | 0 | 0 | 0 | 0 | 0 | 0 | 1 | 0 |
| Prey | Neuroptera | 0 | 0 | 1 | 1 | 0 | 0 | 2 | 1 | 0 | 2 | 1 | 4 | 0 | 1 | 0 | 0 | 0 | 0 | 1 | 0 | 0 | 0 | 3 | 2 |
| Prey | Orthoptera | 0 | 0 | 6 | 2 | 2 | 10 | 3 | 15 | 8 | 9 | 11 | 21 | 1 | 14 | 3 | 3 | 3 | 1 | 8 | 0 | 17 | 15 | 31 | 7 |
| Prey | Pseudoscorpions | 1 | 0 | 3 | 1 | 1 | 5 | 4 | 4 | 6 | 5 | 6 | 4 | 0 | 1 | 1 | 2 | 0 | 0 | 4 | 2 | 0 | 6 | 8 | 5 |
| Prey | Thysanura | 8 | 26 | 53 | 4 | 85 | 77 | 146 | 60 | 312 | 139 | 154 | 179 | 6 | 5 | 1 | 4 | 11 | 13 | 95 | 10 | 23 | 267 | 220 | 52 |
| Prey | Ticks | 0 | 3 | 2 | 0 | 4 | 1 | 0 | 1 | 0 | 3 | 2 | 4 | 1 | 2 | 0 | 10 | 0 | 0 | 0 | 11 | 13 | 1 | 0 | 21 |
| Prey | Trichoptera | 0 | 0 | 0 | 0 | 0 | 1 | 0 | 0 | 0 | 0 | 0 | 0 | 0 | 0 | 0 | 0 | 0 | 0 | 0 | 0 | 0 | 0 | 0 | 0 |
| Prey | Wasps | 1 | 1 | 2 | 0 | 0 | 0 | 0 | 2 | 1 | 2 | 4 | 6 | 1 | 3 | 2 | 1 | 4 | 1 | 5 | 2 | 1 | 25 | 18 | 3 |

**Online Resource 2:**

Additional figures for patch cardinalities 3-9: overall values (Figure S1), univariate trends (Figures S2-S5) and variance partitioning analysis (Figures S6-S8).

**Fig. S1:** The change in the median, lower quartile, upper quartile and mean (black point) effective alpha, beta and gamma diversities of spiders with the number of patches in each of the landscapes. Whiskers represent 1.5×(upper quartile - lower quartile). Outliers are not shown.


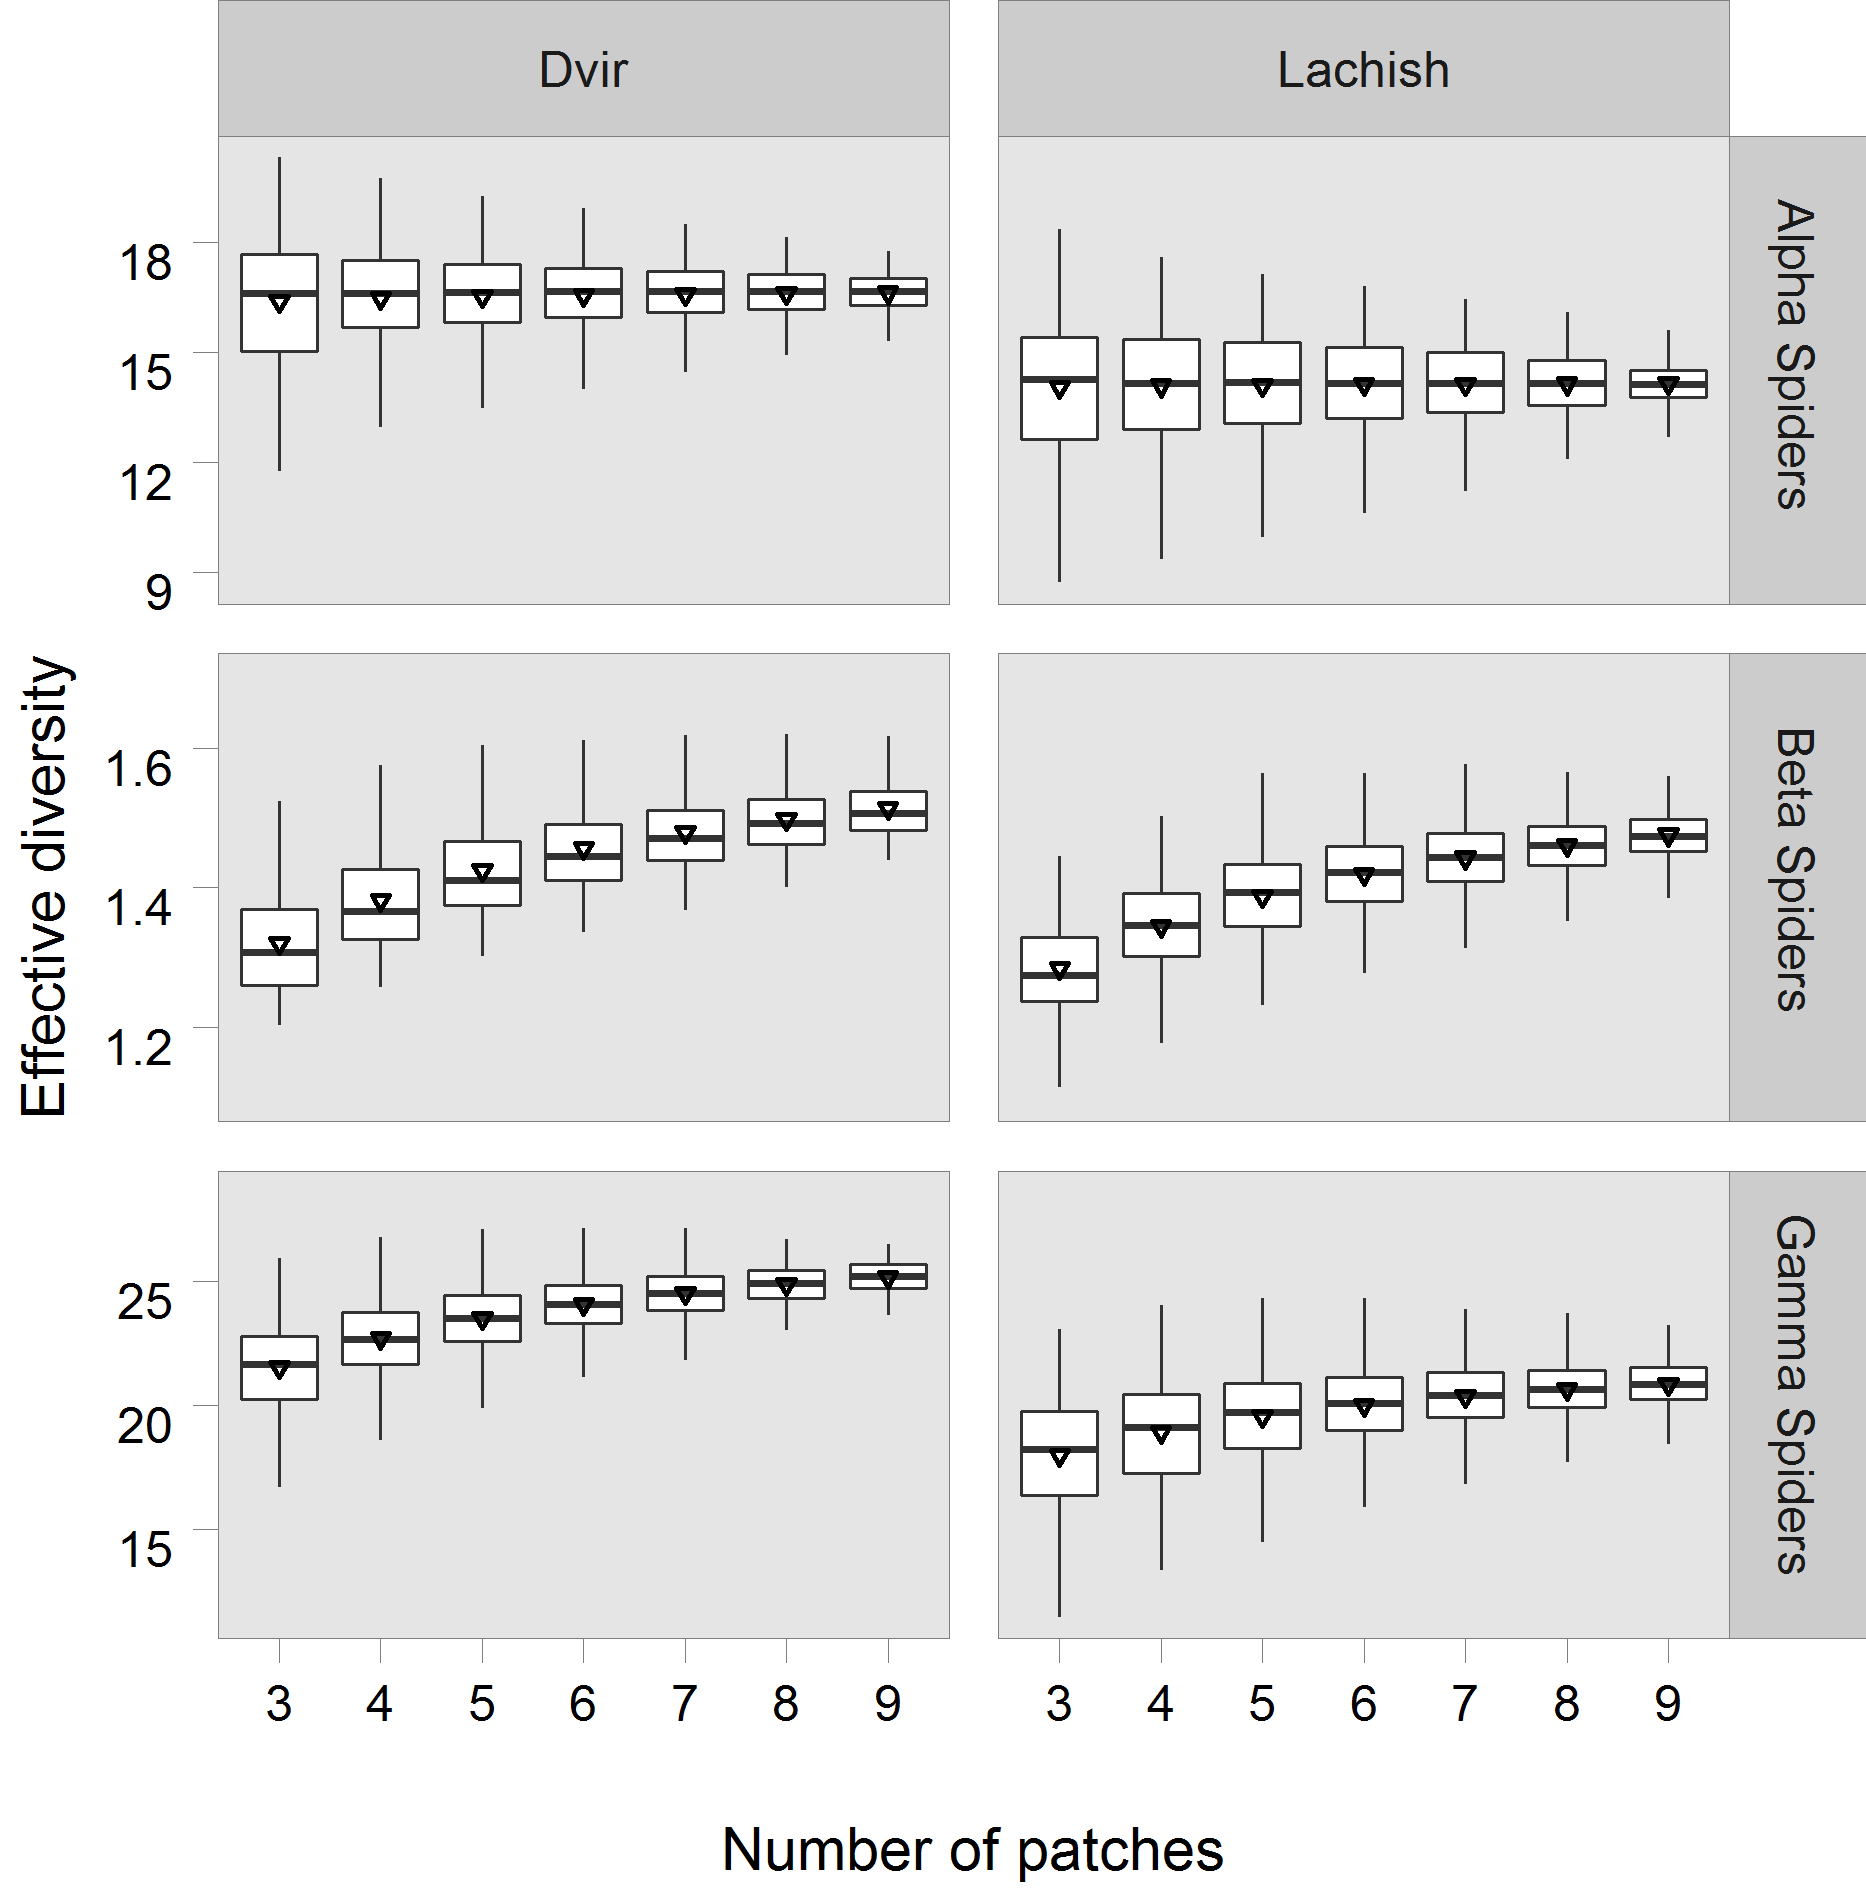


**Fig. S2:** The change of spider alpha, beta and gamma diversities with habitat alpha, beta and gamma diversities, in each of the landscapes. Pseudo-landscapes (points) are colored according to patch-cardinality (3-9 patches) and the solid lines are linear models fitted separately to each patch cardinality.


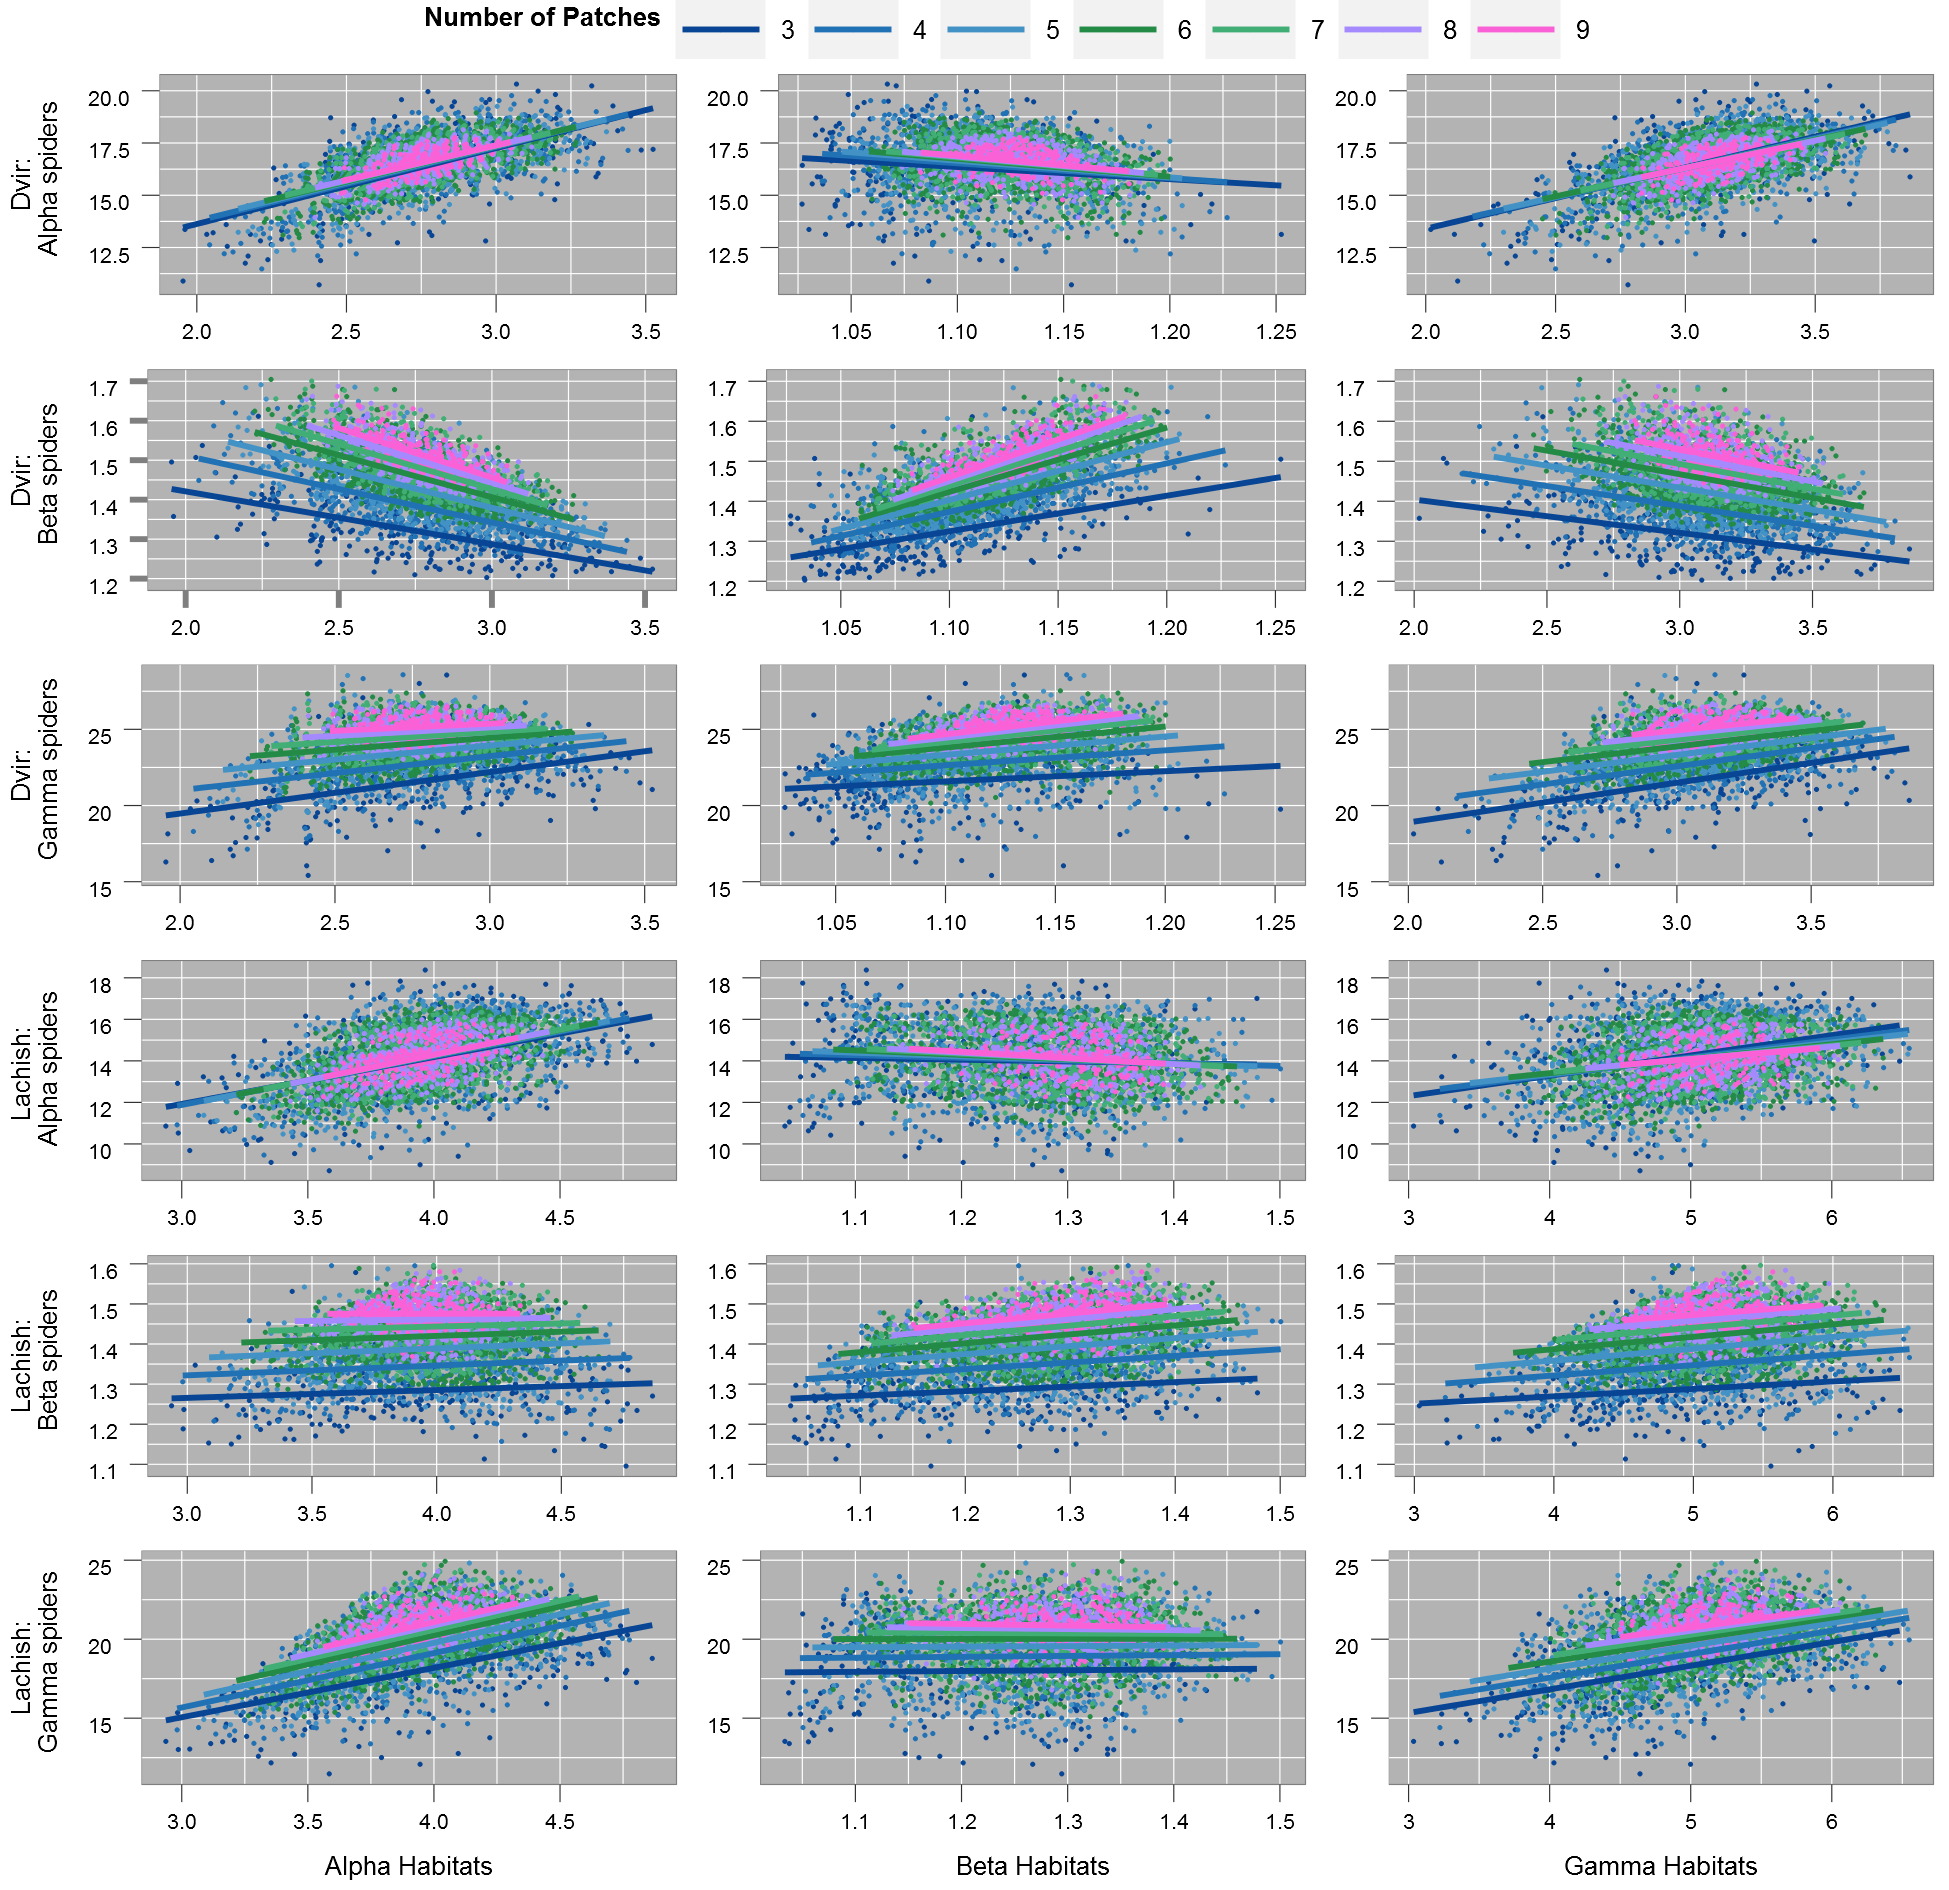


**Fig. S3:** The change of spider alpha, beta and gamma diversities with prey alpha, beta and gamma diversities, in each of the landscapes. Pseudo-landscapes (points) are colored according to patch-cardinality (3-9 patches) and the solid lines are linear models fitted separately to each patch cardinality.


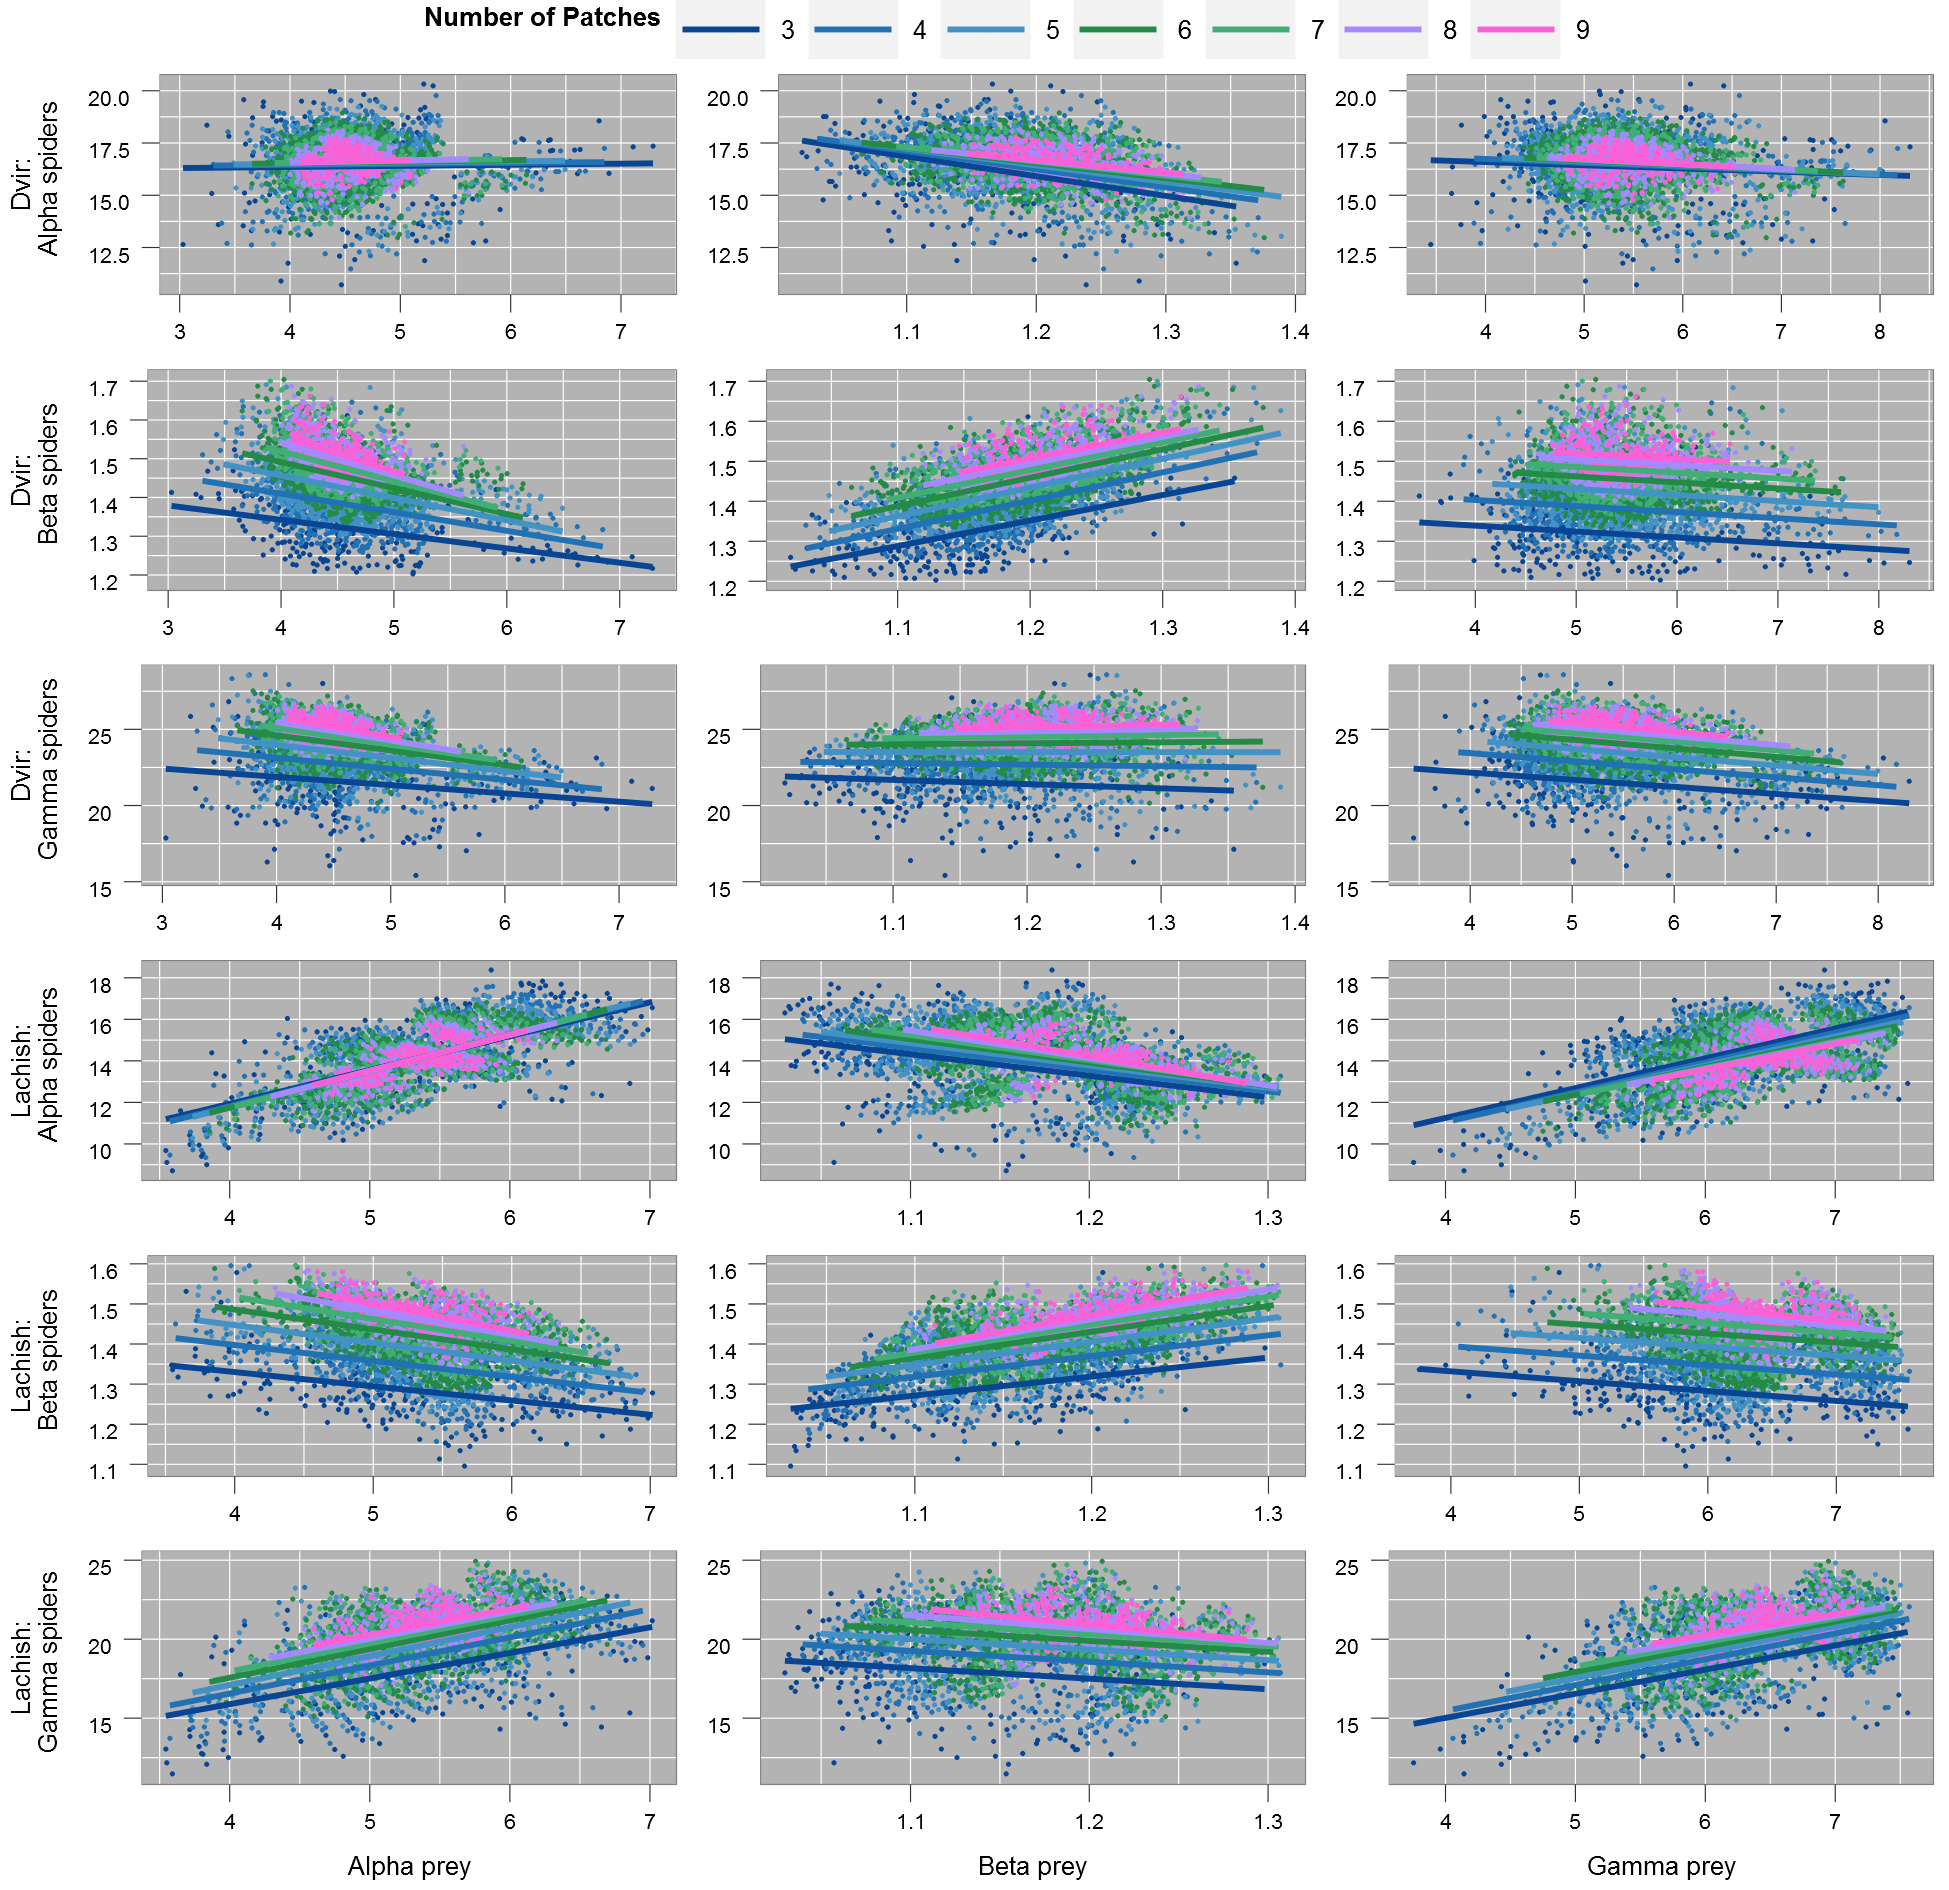


**Fig. S4:** The change of spider alpha, beta and gamma diversities with the two area variables (total area and area evenness) and the two connectivity variables (length of the minimum spanning tree and the clumping index), in each of the landscapes. Pseudo-landscapes (points) are colored according to patch-cardinality (3-9 patches) and the solid lines are linear models fitted separately to each patch-cardinality. For clarity, one extreme point in each landscape was removed in the rightmost column.


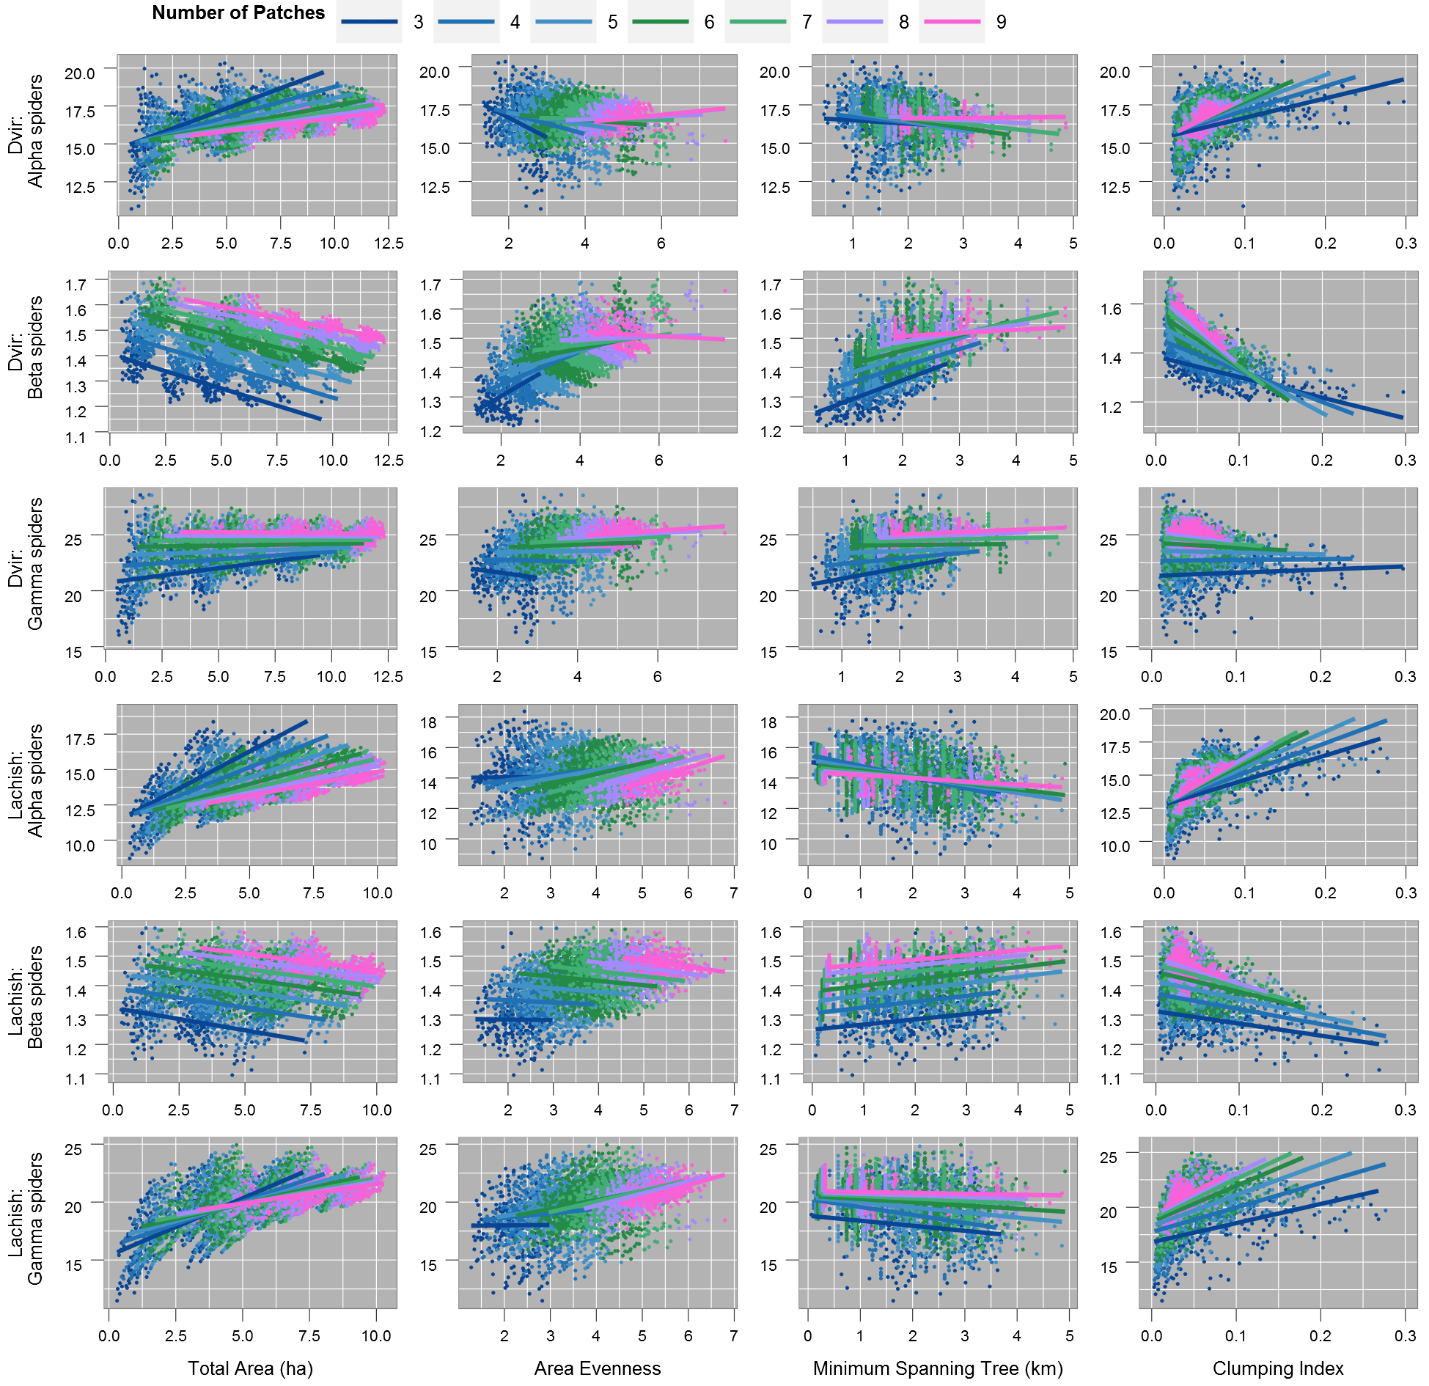


**Fig. S5:** The change of spider alpha, beta and gamma diversities with the total number of samples, in each of the landscapes. Psuedo-landscapes (points) are colored according to patch-cardinality (3-9 patches) and the solid lines are linear models fitted separately to each patch-cardinality.


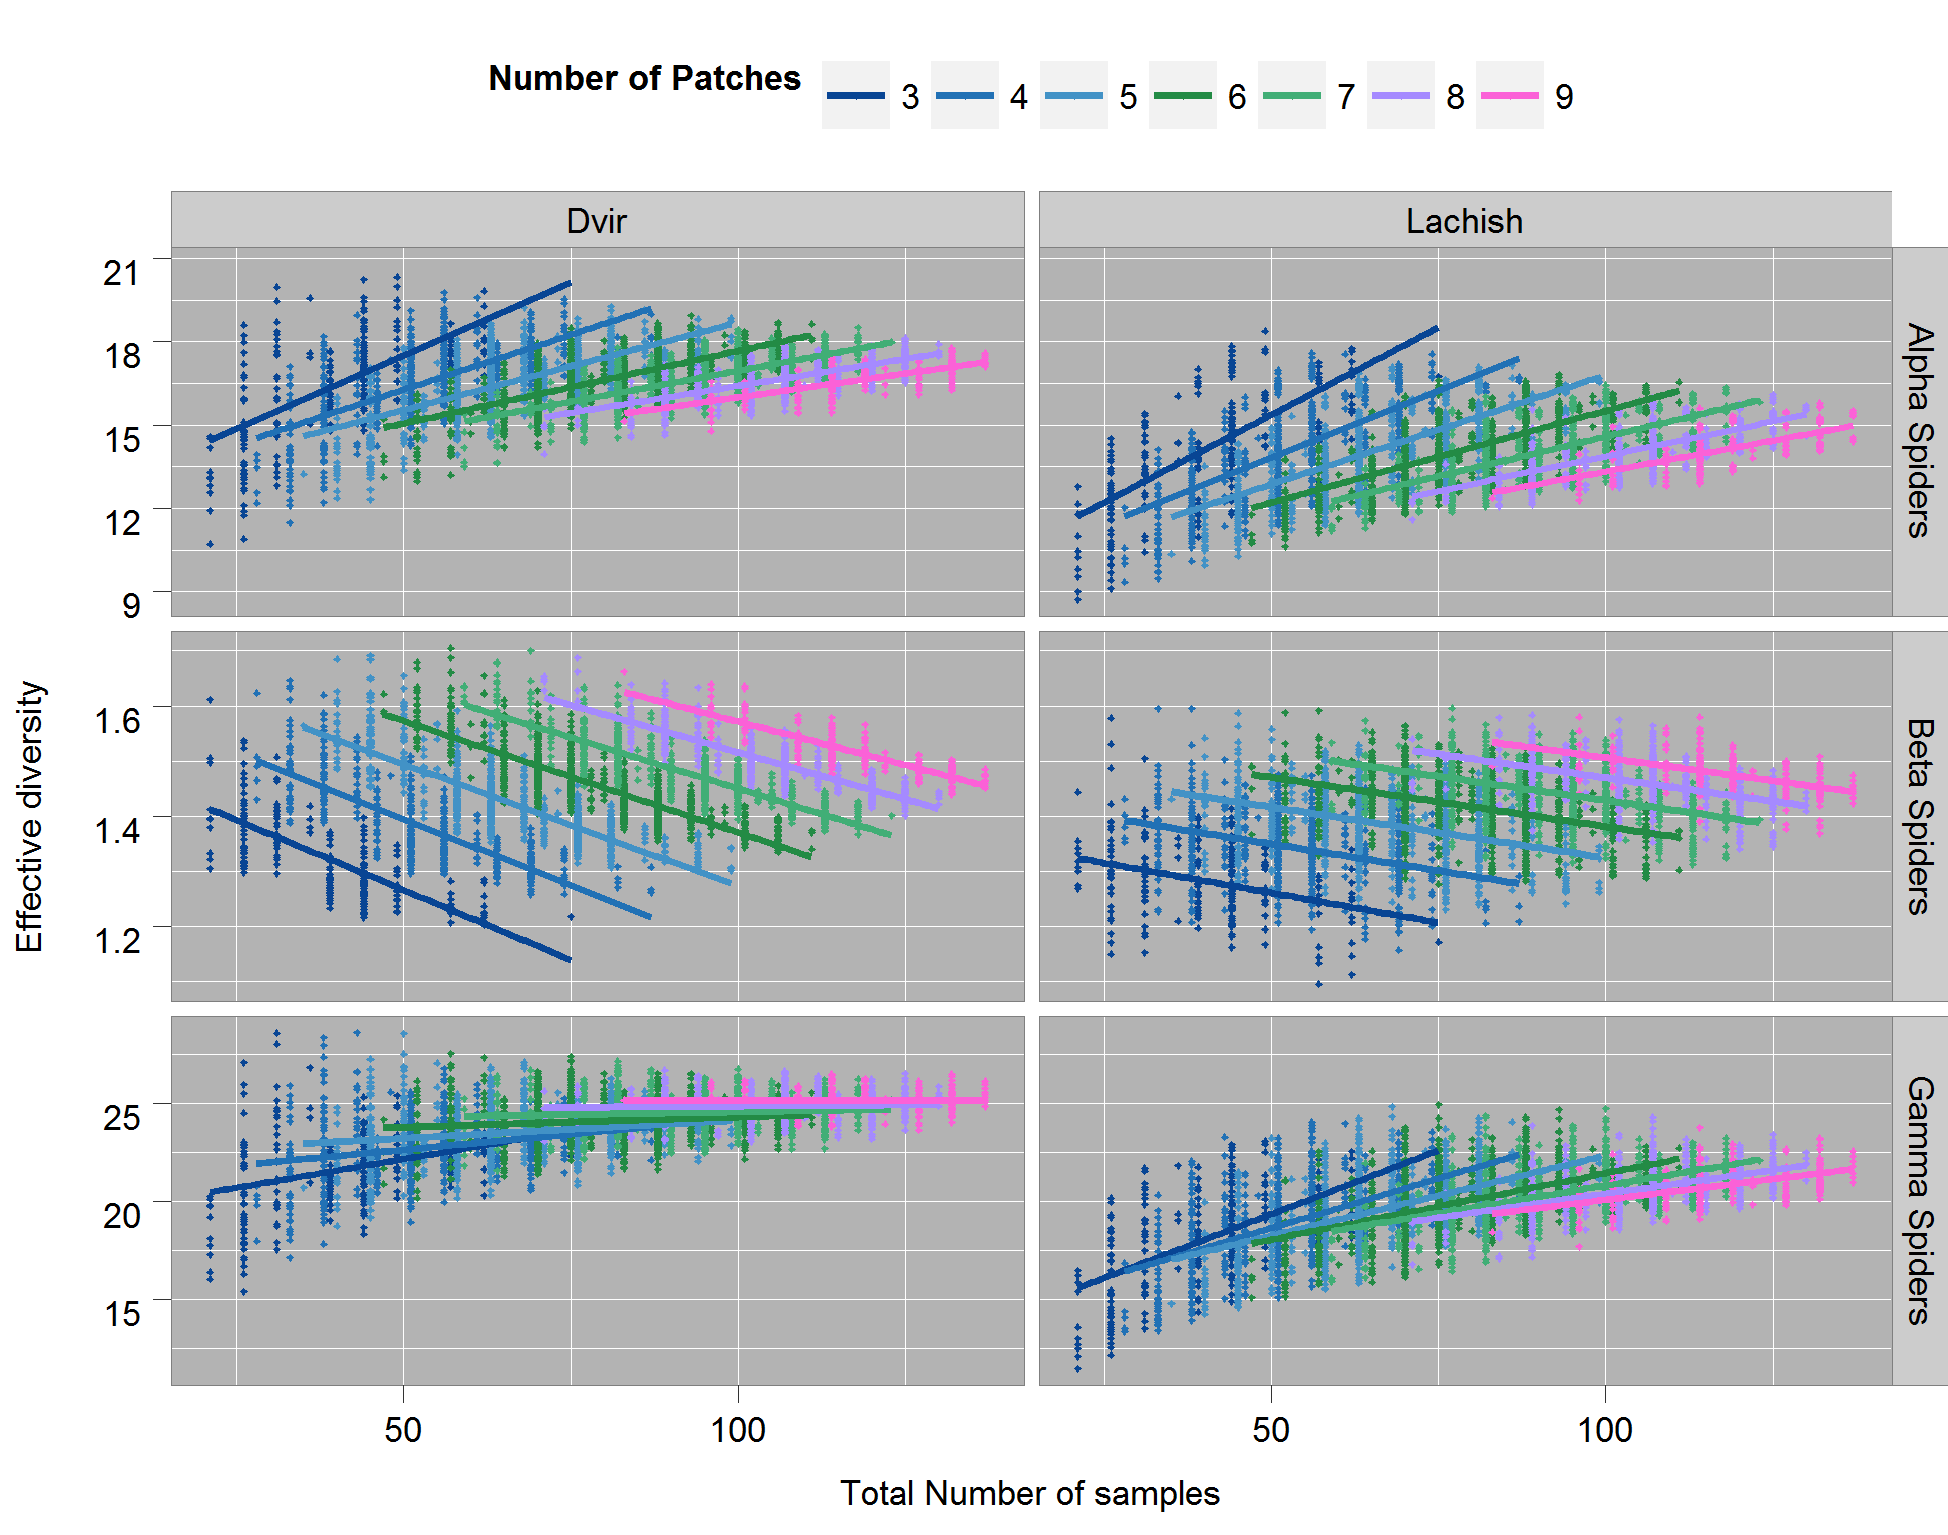


**Fig. S6:** The results of the variance partitioning analysis for spider alpha, beta and gamma diversity in each of the landscapes in the different patch-cardinalities (3-9 patches). Each stacked bar shows the proportion from the total explained variance accounted by each of the 11 explanatory variables.


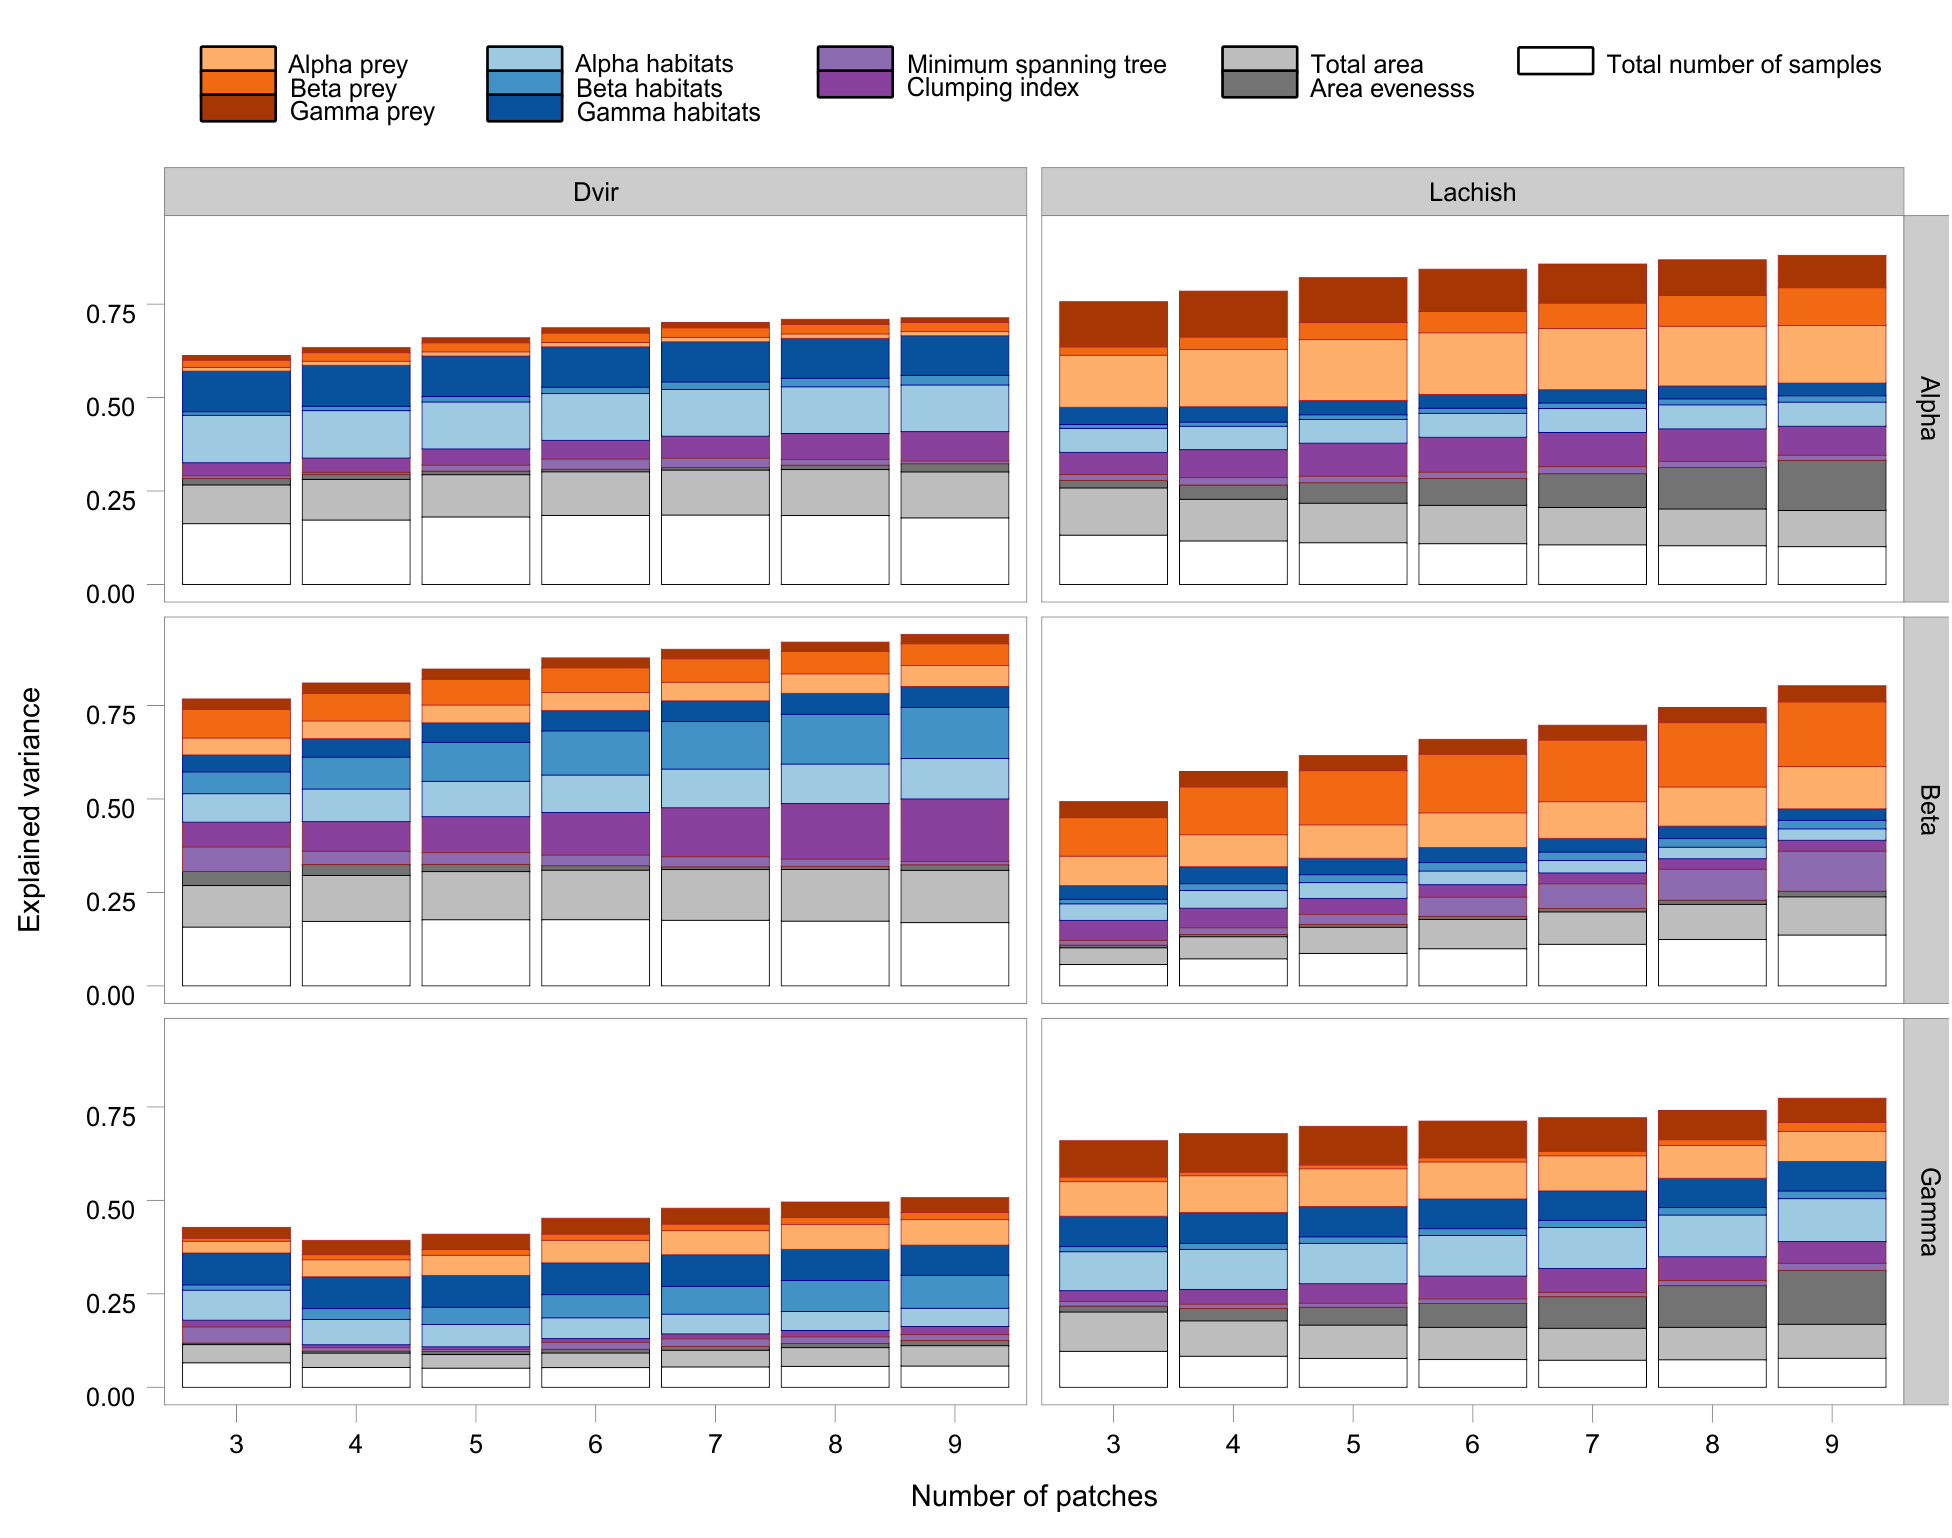


**Fig. S7:** The results of the variance partitioning analysis for spider alpha, beta and gamma diversity in each of the landscapes and according to each of the seven patch-cardinalities (3-9 patches). Each stacked bar shows the explained variance accounted by each of 5 thematic groups.


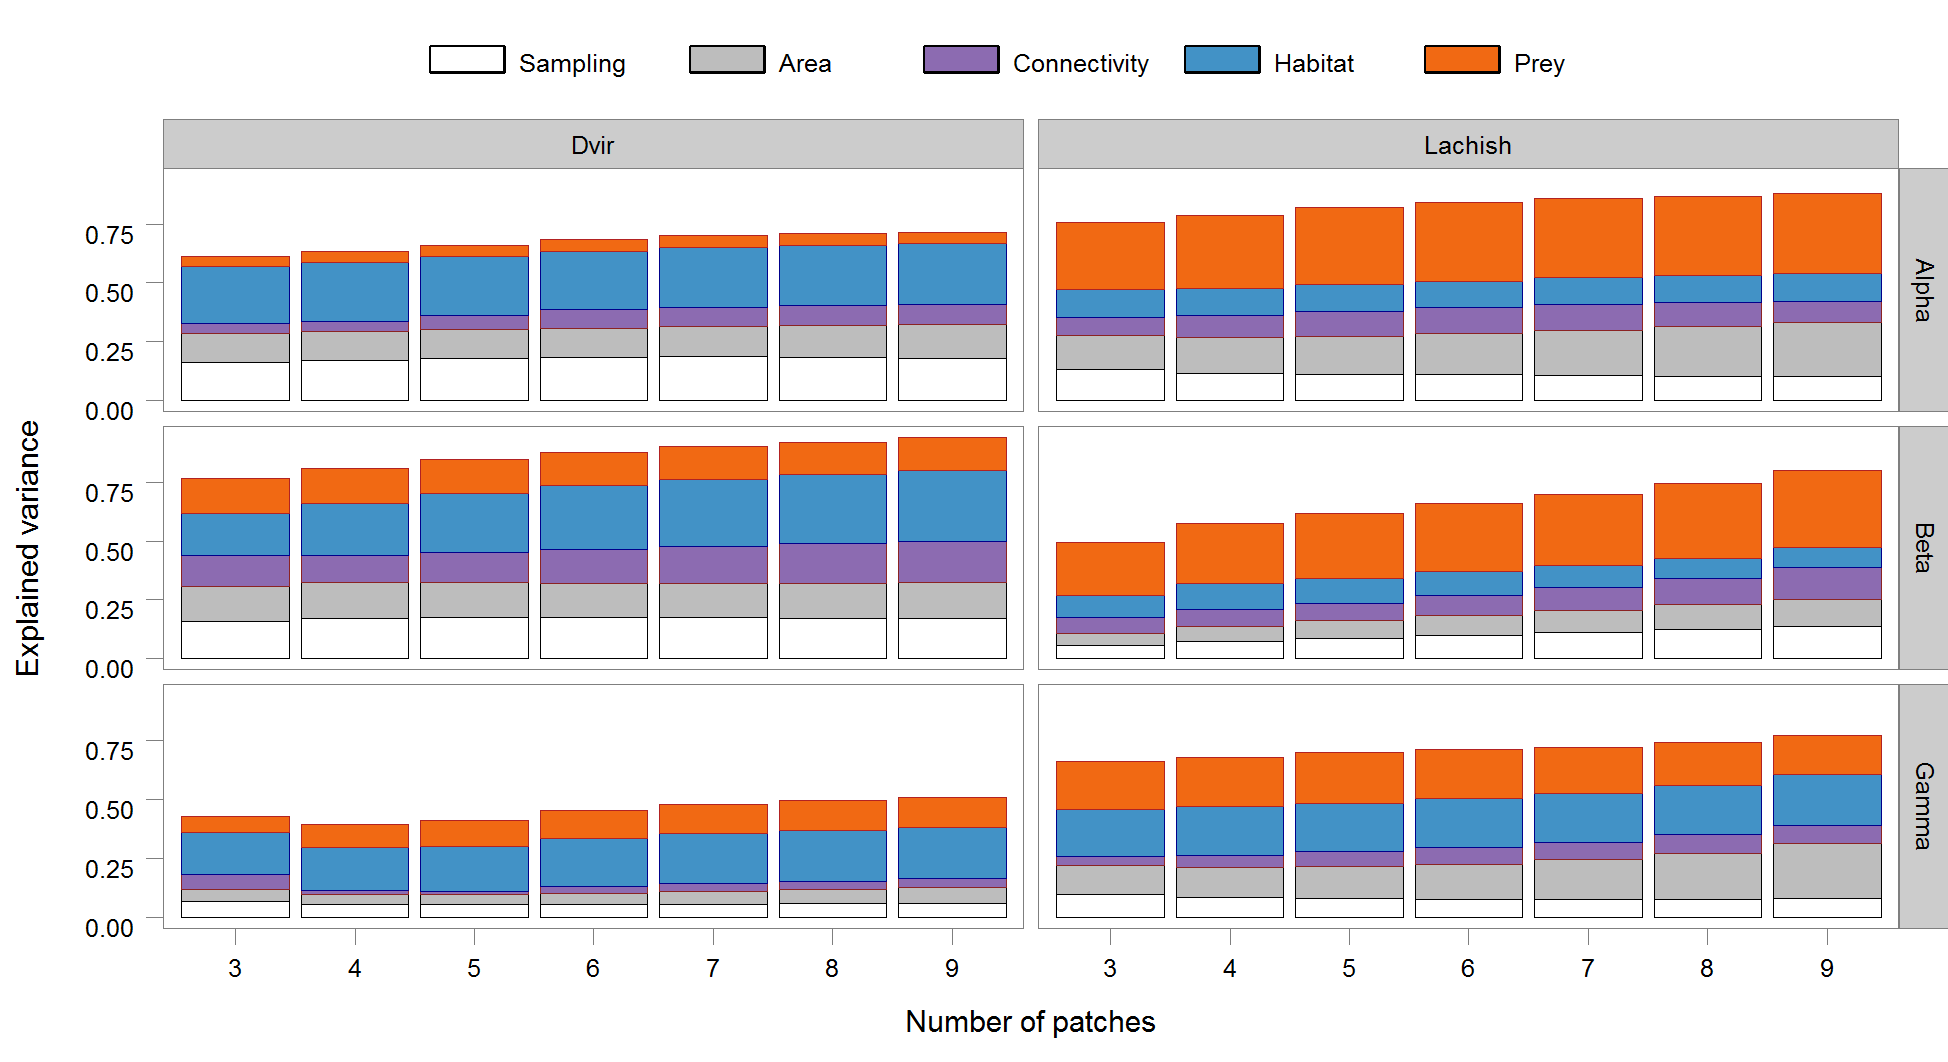


**Fig. S8:** The results of the variance partitioning analysis for spider alpha, beta and gamma diversity in each of the landscapes in the different patch-cardinalities (3-9 patches). Each stacked bar shows the explained variance accounted by each of sampling, area, connectivity and the three diversity components. Each diversity component is the sum of the explained variance of the corresponding habitat and prey variables (e.g., alpha is the sum of the variance explained by alpha habitat and alpha prey)


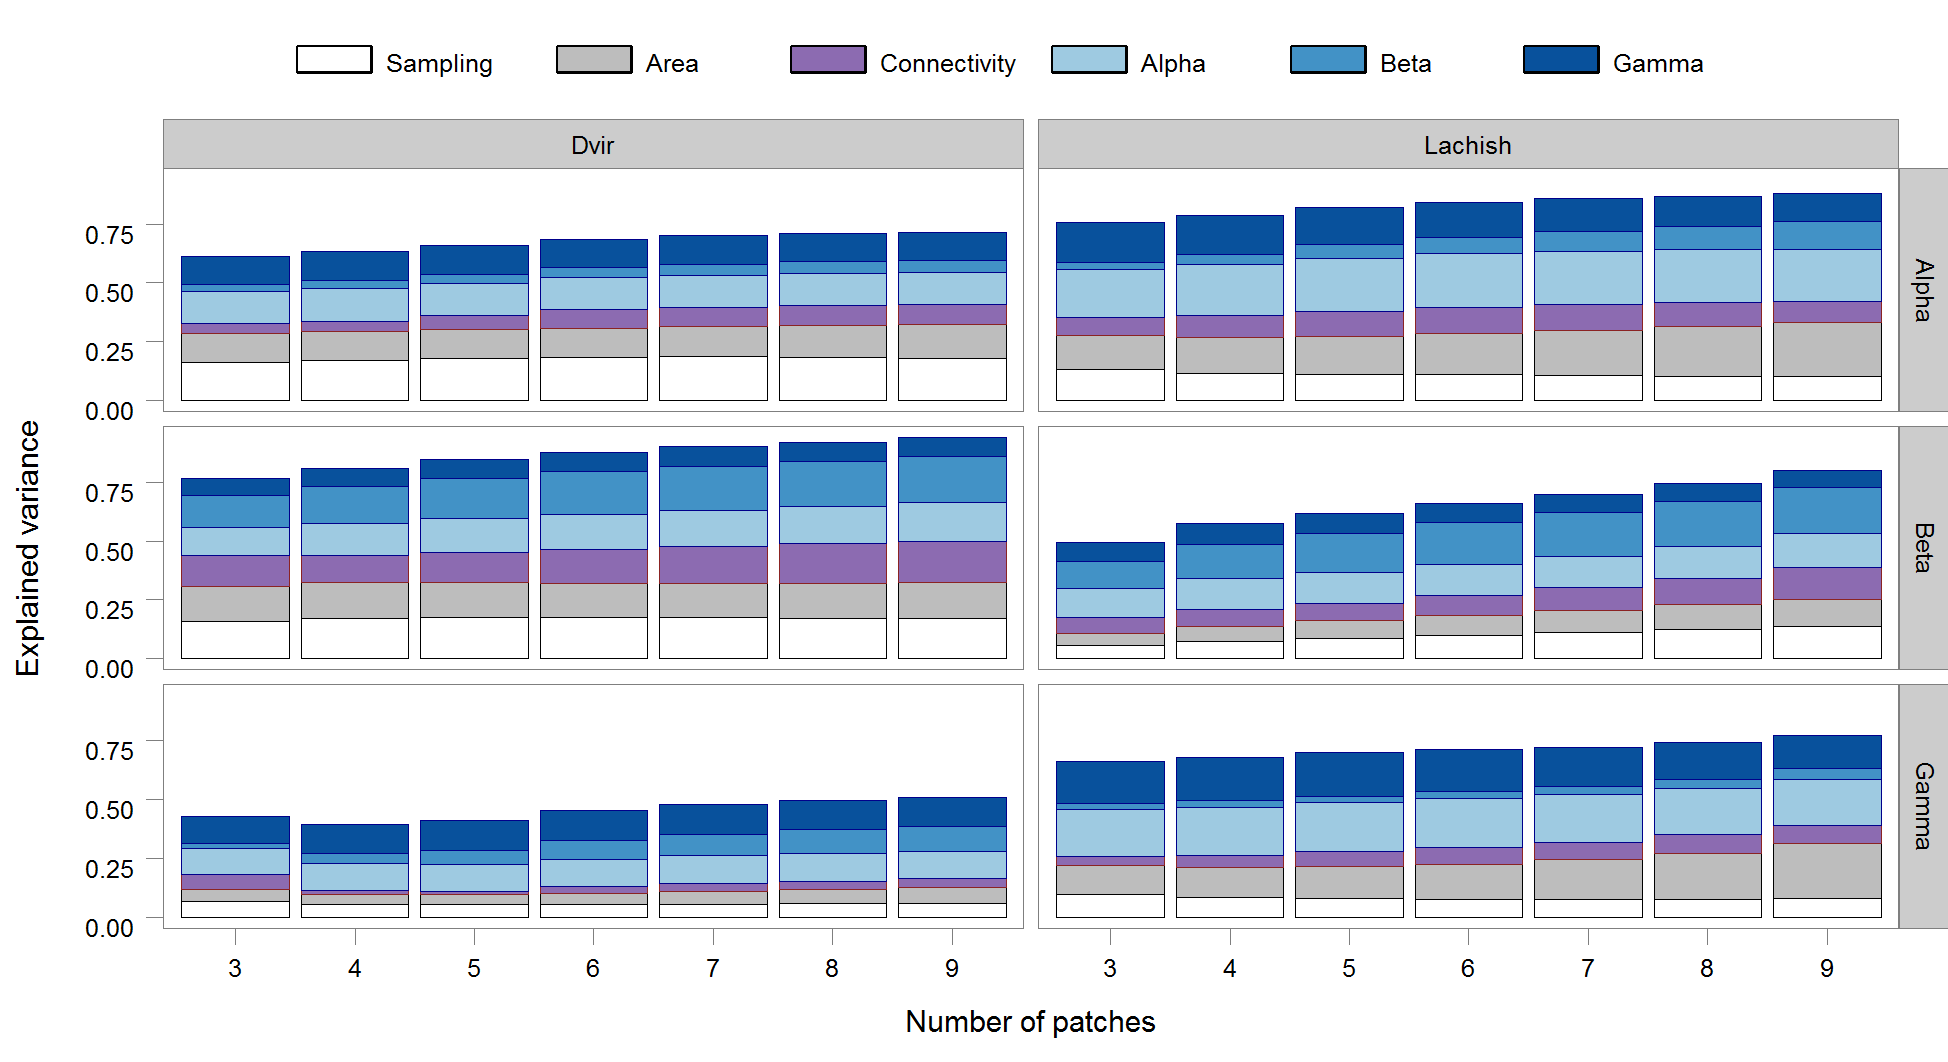


| Online Resource 3: Results of variance partitioning analyses in Dvir and Lachish when permuting the dependent variable | | | | | | | | | | | | | | | | | | | | | |
| --- | --- | --- | --- | --- | --- | --- | --- | --- | --- | --- | --- | --- | --- | --- | --- | --- | --- | --- | --- | --- | --- |
| **Dependent** | **Spider Alpha** | | | | | | | **Spider Beta** | | | | | | | **Spider Gamma** | | | | | | |
| **Number of Patches** | 3 | 4 | 5 | 6 | 7 | 8 | 9 | 3 | 4 | 5 | 6 | 7 | 8 | 9 | 3 | 4 | 5 | 6 | 7 | 8 | 9 |
| **Explained variance** | | | | | | | | | | | | | | | | | | | | | |
| Dvir | 0.052 | 0.023 | 0.013 | 0.011 | 0.014 | 0.02 | 0.049 | 0.051 | 0.024 | 0.014 | 0.012 | 0.014 | 0.021 | 0.049 | 0.052 | 0.022 | 0.013 | 0.012 | 0.014 | 0.02 | 0.05 |
| Lachish | 0.048 | 0.023 | 0.015 | 0.012 | 0.015 | 0.023 | 0.05 | 0.051 | 0.023 | 0.014 | 0.012 | 0.013 | 0.022 | 0.049 | 0.046 | 0.023 | 0.014 | 0.012 | 0.014 | 0.023 | 0.048 |
| **Dvir: LMG - explained variance** | | | | | | | | | | | | | | | | | | | | | |
| **Total number of samples** | 0.005 | 0.002 | 0.001 | 0.001 | 0.001 | 0.002 | 0.005 | 0.005 | 0.002 | 0.001 | 0.001 | 0.001 | 0.002 | 0.005 | 0.004 | 0.002 | 0.001 | 0.001 | 0.001 | 0.002 | 0.005 |
| **Total area** | 0.004 | 0.002 | 0.001 | 0.001 | 0.001 | 0.002 | 0.005 | 0.005 | 0.002 | 0.001 | 0.001 | 0.001 | 0.002 | 0.005 | 0.004 | 0.002 | 0.001 | 0.001 | 0.001 | 0.002 | 0.005 |
| **Area Evenness** | 0.005 | 0.002 | 0.001 | 0.001 | 0.001 | 0.002 | 0.004 | 0.004 | 0.002 | 0.001 | 0.001 | 0.001 | 0.002 | 0.004 | 0.005 | 0.002 | 0.001 | 0.001 | 0.001 | 0.002 | 0.004 |
| **Minimum spanning tree** | 0.005 | 0.002 | 0.001 | 0.001 | 0.002 | 0.002 | 0.004 | 0.006 | 0.002 | 0.001 | 0.001 | 0.002 | 0.002 | 0.004 | 0.005 | 0.002 | 0.001 | 0.001 | 0.001 | 0.002 | 0.004 |
| **Clumping index** | 0.005 | 0.002 | 0.001 | 0.001 | 0.001 | 0.002 | 0.004 | 0.005 | 0.002 | 0.001 | 0.001 | 0.001 | 0.002 | 0.005 | 0.005 | 0.002 | 0.001 | 0.001 | 0.002 | 0.002 | 0.005 |
| **Alpha Habitat** | 0.004 | 0.002 | 0.001 | 0.001 | 0.001 | 0.002 | 0.004 | 0.005 | 0.002 | 0.001 | 0.001 | 0.001 | 0.002 | 0.005 | 0.004 | 0.002 | 0.001 | 0.001 | 0.001 | 0.002 | 0.005 |
| **Beta Habitat** | 0.004 | 0.002 | 0.001 | 0.001 | 0.001 | 0.002 | 0.004 | 0.005 | 0.002 | 0.001 | 0.001 | 0.001 | 0.002 | 0.005 | 0.004 | 0.002 | 0.001 | 0.001 | 0.001 | 0.002 | 0.004 |
| **Gamma Habitat** | 0.004 | 0.002 | 0.001 | 0.001 | 0.001 | 0.002 | 0.004 | 0.005 | 0.002 | 0.001 | 0.001 | 0.001 | 0.002 | 0.005 | 0.004 | 0.002 | 0.001 | 0.001 | 0.001 | 0.002 | 0.004 |
| **Alpha Prey** | 0.005 | 0.002 | 0.001 | 0.001 | 0.001 | 0.002 | 0.005 | 0.004 | 0.002 | 0.001 | 0.001 | 0.001 | 0.002 | 0.004 | 0.005 | 0.002 | 0.001 | 0.001 | 0.001 | 0.002 | 0.005 |
| **Beta Prey** | 0.005 | 0.002 | 0.001 | 0.001 | 0.001 | 0.002 | 0.004 | 0.004 | 0.002 | 0.001 | 0.001 | 0.001 | 0.002 | 0.004 | 0.005 | 0.002 | 0.001 | 0.001 | 0.001 | 0.002 | 0.005 |
| **Gamma Prey** | 0.005 | 0.002 | 0.001 | 0.001 | 0.001 | 0.002 | 0.005 | 0.004 | 0.002 | 0.001 | 0.001 | 0.001 | 0.002 | 0.004 | 0.005 | 0.002 | 0.001 | 0.001 | 0.001 | 0.002 | 0.005 |
| **Lachish: LMG - explained variance** | | | | | | | | | | | | | | | | | | | | | |
| **Total number of samples** | 0.004 | 0.002 | 0.001 | 0.001 | 0.001 | 0.002 | 0.004 | 0.005 | 0.002 | 0.001 | 0.001 | 0.001 | 0.002 | 0.004 | 0.004 | 0.002 | 0.001 | 0.001 | 0.001 | 0.002 | 0.005 |
| **Total area** | 0.004 | 0.002 | 0.001 | 0.001 | 0.001 | 0.002 | 0.005 | 0.005 | 0.002 | 0.001 | 0.001 | 0.001 | 0.002 | 0.004 | 0.004 | 0.002 | 0.001 | 0.001 | 0.001 | 0.002 | 0.005 |
| **Area Evenness** | 0.005 | 0.002 | 0.001 | 0.001 | 0.001 | 0.002 | 0.005 | 0.005 | 0.003 | 0.001 | 0.001 | 0.001 | 0.002 | 0.005 | 0.004 | 0.002 | 0.001 | 0.001 | 0.001 | 0.002 | 0.005 |
| **Minimum spanning tree** | 0.004 | 0.002 | 0.001 | 0.001 | 0.001 | 0.002 | 0.005 | 0.005 | 0.002 | 0.001 | 0.001 | 0.001 | 0.002 | 0.005 | 0.004 | 0.002 | 0.001 | 0.001 | 0.001 | 0.002 | 0.004 |
| **Clumping index** | 0.004 | 0.002 | 0.001 | 0.001 | 0.001 | 0.002 | 0.004 | 0.005 | 0.002 | 0.001 | 0.001 | 0.001 | 0.002 | 0.004 | 0.005 | 0.002 | 0.001 | 0.001 | 0.001 | 0.002 | 0.004 |
| **Alpha Habitat** | 0.005 | 0.002 | 0.001 | 0.001 | 0.001 | 0.002 | 0.005 | 0.005 | 0.002 | 0.001 | 0.001 | 0.001 | 0.002 | 0.005 | 0.004 | 0.002 | 0.001 | 0.001 | 0.001 | 0.003 | 0.004 |
| **Beta Habitat** | 0.004 | 0.002 | 0.001 | 0.001 | 0.001 | 0.002 | 0.004 | 0.004 | 0.002 | 0.002 | 0.001 | 0.001 | 0.002 | 0.004 | 0.004 | 0.002 | 0.001 | 0.001 | 0.001 | 0.002 | 0.004 |
| **Gamma Habitat** | 0.004 | 0.002 | 0.001 | 0.001 | 0.001 | 0.002 | 0.004 | 0.004 | 0.002 | 0.001 | 0.001 | 0.001 | 0.002 | 0.004 | 0.004 | 0.002 | 0.001 | 0.001 | 0.001 | 0.002 | 0.004 |
| **Alpha Prey** | 0.004 | 0.002 | 0.001 | 0.001 | 0.001 | 0.002 | 0.004 | 0.005 | 0.002 | 0.001 | 0.001 | 0.001 | 0.002 | 0.004 | 0.004 | 0.002 | 0.001 | 0.001 | 0.001 | 0.002 | 0.004 |
| **Beta Prey** | 0.004 | 0.002 | 0.001 | 0.001 | 0.001 | 0.002 | 0.005 | 0.004 | 0.002 | 0.001 | 0.001 | 0.001 | 0.002 | 0.004 | 0.004 | 0.002 | 0.001 | 0.001 | 0.001 | 0.002 | 0.005 |
| **Gamma Prey** | 0.004 | 0.002 | 0.001 | 0.001 | 0.001 | 0.002 | 0.004 | 0.005 | 0.002 | 0.001 | 0.001 | 0.001 | 0.002 | 0.004 | 0.004 | 0.002 | 0.001 | 0.001 | 0.001 | 0.002 | 0.004 |

| Online Resource 4: Results of variance partitioning analyses in Dvir. | | | | | | | | | | | | | | | | | | | | | |
| --- | --- | --- | --- | --- | --- | --- | --- | --- | --- | --- | --- | --- | --- | --- | --- | --- | --- | --- | --- | --- | --- |
| **Dependent** | **Spider Alpha** | | | | | | | **Spider Beta** | | | | | | | **Spider Gamma** | | | | | | |
| **Number of Patches** | 3 | 4 | 5 | 6 | 7 | 8 | 9 | 3 | 4 | 5 | 6 | 7 | 8 | 9 | 3 | 4 | 5 | 6 | 7 | 8 | 9 |
| **number of combinations** | 220 | 495 | 792 | 924 | 792 | 495 | 220 | 220 | 495 | 792 | 924 | 792 | 495 | 220 | 220 | 495 | 792 | 924 | 792 | 495 | 220 |
| **F value** | 29.88 | 75.89 | 137.72 | 181.71 | 166.18 | 107.57 | 47.21 | 62.46 | 187.61 | 394.70 | 591.33 | 639.23 | 507.69 | 294.44 | 14.14 | 28.46 | 49.23 | 68.50 | 65.25 | 43.14 | 19.46 |
| **p value** | 4.49  E-37 | 7.35  E-98 | 2.33  E-174 | 4.90  E-221 | 6.62  E-196 | 3.05  E-122 | 1.66  E-50 | 9.62  E-60 | 1.77  E-166 | 7.52  E-310 | 0.00  E+00 | 0.00  E+00 | 2.75  E-257 | 2.98  E-120 | 3.63  E-20 | 6.42  E-46 | 8.15  E-82 | 2.79  E-111 | 1.03  E-102 | 7.61  E-65 | 1.37  E-26 |
| **Explained variance** | 0.61 | 0.63 | 0.66 | 0.69 | 0.70 | 0.71 | 0.71 | 0.77 | 0.81 | 0.85 | 0.88 | 0.90 | 0.92 | 0.94 | 0.43 | 0.39 | 0.41 | 0.45 | 0.48 | 0.50 | 0.51 |
| **Linear Coefficients** | | | | | | | | | | | | | | | | | | | | | |
| **Total number of samples** | 2.20  E-01 | 1.71  E-01 | 1.46  E-01 | 1.29  E-01 | 1.15  E-01 | 1.04  E-01 | 9.36  E-02 | -5.87  E-03 | -5.9  1E-03 | -5.26  E-03 | -4.50  E-03 | -3.83  E-03 | -3.21  E-03 | -2.53  E-03 | 2.01  E-01 | 1.46  E-01 | 1.27  E-01 | 1.18  E-01 | 1.11  E-01 | 1.05  E-01 | 1.02  E-01 |
| **Total area** | -1.13  E-04 | -8.04  E-05 | -6.52  E-05 | -5.73  E-05 | -5.26  E-05 | -4.87  E-05 | -4.50  E-05 | 1.88  E-06 | 2.04  E-06 | 1.83  E-06 | 1.53  E-06 | 1.28  E-06 | 1.09  E-06 | 9.01  E-07 | -1.25  E-04 | -8.27  E-05 | -6.63  E-05 | -6.07  E-05 | -5.86  E-05 | -5.63  E-05 | -5.43  E-05 |
| **Area Evenness** | -2.59  E-01 | -3.28  E-01 | -2.86  E-01 | -2.09  E-01 | -1.32  E-01 | -7.04  E-02 | -4.34  E-02 | 1.69  E-02 | 5.43  E-03 | 1.16  E-03 | -1.80  E-03 | -4.75  E-03 | -8.47  E-03 | -1.38  E-02 | -7.61  E-02 | -3.97  E-01 | -4.36  E-01 | -3.78  E-01 | -3.08  E-01 | -2.66  E-01 | -2.9  E-01 |
| **Minimum spanning tree** | 6.43  E-04 | -2.89  E-05 | -2.89  E-04 | -3.45  E-04 | -2.80  E-04 | -2.18  E-04 | -1.51  E-04 | 3.89  E-05 | 1.35  E-05 | 5.01  E-06 | 1.34  E-06 | 1.20  E-06 | 2.15  E-06 | 2.34  E-06 | 1.59  E-03 | 2.52  E-04 | -3.08  E-04 | -4.86  E-04 | -4.05  E-04 | -3.06  E-04 | -2.12  E-04 |
| **Clumping index** | 6.71  E+00 | 4.00  E+00 | 2.35  E+00 | 2.67  E+00 | 6.08  E+00 | 1.07  E+01 | 1.57  E+01 | 1.59  E-01 | 3.9  7E-02 | -9.02  E-02 | -2.23  E-01 | -3.80  E-01 | -6.20  E-01 | -9.86  E-01 | 1.16  E+01 | 6.36  E+00 | 1.56  E+00 | -5.52  E-01 | 1.86  E+00 | 5.07  E+00 | 7.36  E+00 |
| **Alpha Habitat** | 8.13  E+00 | 4.27  E+00 | 2.58  E+00 | 6.60  E-01 | -4.22  E+00 | -1.26  E+01 | -2.24  E+01 | 1.72  E-01 | 3.58  E-01 | 5.40  E-01 | 8.92  E-01 | 1.46  E+00 | 2.20  E+00 | 3.06  E+00 | 1.15  E+01 | 8.02  E+00 | 7.97  E+00 | 1.09  E+01 | 1.25  E+01 | 1.14  E+01 | 9.82  E+00 |
| **Beta Habitat** | 1.25  E+01 | 5.99  E+00 | 3.08  E+00 | -5.98  E-01 | -1.08  E+01 | -2.87  E+01 | -5.09  E+01 | 7.49  E-01 | 1.43  E+00 | 2.03  E+00 | 2.99  E+00 | 4.38  E+00 | 6.13  E+00 | 8.11  E+00 | 2.29  E+01 | 2.21  E+01 | 2.63  E+01 | 3.63  E+01 | 4.29  E+01 | 4.28  E+01 | 4.04  E+01 |
| **Gamma Habitat** | -4.12  E+00 | -7.57  E-01 | 6.34  E-01 | 2.33  E+00 | 6.66  E+00 | 1.40  E+01 | 2.27  E+01 | -2.18  E-01 | -4.02  E-01 | -5.75  E-01 | -8.94  E-01 | -1.40  E+00 | -2.05  E+00 | -2.81  E+00 | -6.97  E+00 | -4.09  E+00 | -4.33  E+00 | -6.97  E+00 | -8.42  E+00 | -7.38  E+00 | -5.97  E+00 |
| **Alpha Prey** | 1.62  E+00 | 3.07  E+00 | 1.93  E+00 | 8.25  E-01 | 1.18  E+00 | 2.00  E+00 | 1.91  E+00 | 8.08  E-02 | 7.74  E-02 | 1.38  E-01 | 1.77  E-01 | 1.61  E-01 | 1.38  E-01 | 1.83  E-01 | 3.62  E+00 | 6.32  E+00 | 5.70  E+00 | 4.24  E+00 | 4.12  E+00 | 4.88  E+00 | 5.43  E+00 |
| **Beta Prey** | 7.89  E+00 | 1.52  E+01 | 1.20  E+01 | 7.77  E+00 | 8.37  E+00 | 1.05  E+01 | 9.51  E+00 | 6.46  E-01 | 6.11  E-01 | 7.78  E-01 | 8.82  E-01 | 8.05  E-01 | 7.29  E-01 | 9.22  E-01 | 2.07  E+01 | 3.33  E+01 | 3.20  E+01 | 2.61  E+01 | 2.46  E+01 | 2.61  E+01 | 2.75  E+01 |
| **Gamma Prey** | -1.53  E+00 | -2.75  E+00 | -1.79  E+00 | -8.50  E-01 | -1.09  E+00 | -1.70  E+00 | -1.58  E+00 | -9.35  E-02 | -9.69  E-02 | -1.48  E-01 | -1.81  E-01 | -1.69  E-01 | -1.52  E-01 | -1.93  E-01 | -3.67  E+00 | -6.05  E+00 | -5.53  E+00 | -4.31  E+00 | -4.16  E+00 | -4.72  E+00 | -5.17  E+00 |
| **LMG - explained variance** | | | | | | | | | | | | | | | | | | | | | |
| **Total number of samples** | 0.16 | 0.17 | 0.18 | 0.18 | 0.19 | 0.18 | 0.18 | 0.16 | 0.17 | 0.18 | 0.18 | 0.18 | 0.17 | 0.17 | 0.07 | 0.05 | 0.05 | 0.05 | 0.05 | 0.06 | 0.06 |
| **Total area** | 0.10 | 0.11 | 0.11 | 0.12 | 0.12 | 0.12 | 0.12 | 0.11 | 0.12 | 0.13 | 0.13 | 0.14 | 0.14 | 0.14 | 0.05 | 0.04 | 0.04 | 0.04 | 0.04 | 0.05 | 0.05 |
| **Area Evenness** | 0.02 | 0.01 | 0.01 | 0.01 | 0.01 | 0.01 | 0.02 | 0.04 | 0.03 | 0.02 | 0.01 | 0.01 | 0.01 | 0.01 | 0.00 | 0.01 | 0.01 | 0.01 | 0.01 | 0.01 | 0.01 |
| **Minimum spanning tree** | 0.01 | 0.01 | 0.02 | 0.03 | 0.02 | 0.02 | 0.01 | 0.07 | 0.04 | 0.03 | 0.03 | 0.03 | 0.02 | 0.01 | 0.04 | 0.01 | 0.01 | 0.02 | 0.02 | 0.02 | 0.02 |
| **Clumping index** | 0.03 | 0.04 | 0.04 | 0.05 | 0.06 | 0.07 | 0.08 | 0.07 | 0.08 | 0.10 | 0.11 | 0.13 | 0.15 | 0.17 | 0.02 | 0.01 | 0.01 | 0.01 | 0.01 | 0.02 | 0.02 |
| **Alpha Habitat** | 0.13 | 0.13 | 0.13 | 0.13 | 0.13 | 0.13 | 0.13 | 0.08 | 0.09 | 0.09 | 0.10 | 0.10 | 0.11 | 0.11 | 0.08 | 0.07 | 0.06 | 0.06 | 0.05 | 0.05 | 0.05 |
| **Beta Habitat** | 0.01 | 0.01 | 0.01 | 0.02 | 0.02 | 0.02 | 0.03 | 0.06 | 0.09 | 0.10 | 0.12 | 0.13 | 0.13 | 0.14 | 0.01 | 0.03 | 0.05 | 0.06 | 0.07 | 0.08 | 0.09 |
| **Gamma Habitat** | 0.11 | 0.11 | 0.11 | 0.11 | 0.11 | 0.11 | 0.11 | 0.05 | 0.05 | 0.05 | 0.05 | 0.06 | 0.06 | 0.06 | 0.09 | 0.09 | 0.09 | 0.09 | 0.08 | 0.08 | 0.08 |
| **Alpha Prey** | 0.01 | 0.01 | 0.01 | 0.01 | 0.01 | 0.01 | 0.01 | 0.05 | 0.05 | 0.05 | 0.05 | 0.05 | 0.05 | 0.06 | 0.03 | 0.05 | 0.05 | 0.06 | 0.06 | 0.07 | 0.07 |
| **Beta Prey** | 0.02 | 0.02 | 0.02 | 0.03 | 0.03 | 0.03 | 0.02 | 0.08 | 0.07 | 0.07 | 0.07 | 0.06 | 0.06 | 0.06 | 0.01 | 0.01 | 0.02 | 0.02 | 0.02 | 0.02 | 0.02 |
| **Gamma Prey** | 0.01 | 0.01 | 0.01 | 0.01 | 0.01 | 0.01 | 0.01 | 0.03 | 0.03 | 0.03 | 0.03 | 0.03 | 0.02 | 0.02 | 0.03 | 0.04 | 0.04 | 0.04 | 0.04 | 0.04 | 0.04 |

| Online Resource 5: Results of variance partitioning analyses in Lachish. | | | | | | | | | | | | | | | | | | | | | |
| --- | --- | --- | --- | --- | --- | --- | --- | --- | --- | --- | --- | --- | --- | --- | --- | --- | --- | --- | --- | --- | --- |
| **Dependent** | **Spider Alpha** | | | | | | | **Spider Beta** | | | | | | | **Spider Gamma** | | | | | | |
| **Number of Patches** | 3 | 4 | 5 | 6 | 7 | 8 | 9 | 3 | 4 | 5 | 6 | 7 | 8 | 9 | 3 | 4 | 5 | 6 | 7 | 8 | 9 |
| **number of combinations** | 220 | 495 | 792 | 924 | 792 | 495 | 220 | 220 | 495 | 792 | 924 | 792 | 495 | 220 | 220 | 495 | 792 | 924 | 792 | 495 | 220 |
| **F value** | 58.56 | 160.23 | 324.19 | 447.68 | 427.01 | 290.05 | 139.00 | 18.39 | 59.04 | 113.78 | 160.45 | 163.80 | 127.69 | 76.70 | 36.66 | 92.74 | 163.89 | 205.28 | 183.43 | 125.31 | 64.54 |
| **p value** | 1.48  E-57 | 2.43  E-153 | 4.26  E-282 | 0.00  E+00 | 0.00  E+00 | 9.04  E-205 | 2.00  E-89 | 2.33  E-25 | 3.74  E-82 | 7.47  E-154 | 1.59  E-204 | 3.31  E-194 | 3.11  E-135 | 6.11  E-67 | 8.32  E-43 | 1.58  E-111 | 2.84  E-194 | 7.41  E-238 | 9.60  E-208 | 8.83  E-134 | 7.22  E-61 |
| **Explained variance** | 0.76 | 0.78 | 0.82 | 0.84 | 0.86 | 0.87 | 0.88 | 0.49 | 0.57 | 0.62 | 0.66 | 0.70 | 0.74 | 0.80 | 0.66 | 0.68 | 0.70 | 0.71 | 0.72 | 0.74 | 0.77 |
| **Linear Coefficients** | | | | | | | | | | | | | | | | | | | | | |
| **Total number of samples** | 2.19  E-02 | 6.46  E-03 | 5.22  E-03 | 3.54  E-03 | -3.31  E-03 | -1.37  E-02 | -2.65  E-02 | -9.67  E-03 | -1.07  E-02 | -1.09  E-02 | -1.06  E-02 | -1.00  E-02 | -9.31  E-03 | -8.59  E-03 | -1.14  E-01 | -1.50  E-01 | -1.54  E-01 | -1.51  E-01 | -1.50  E-01 | -1.53  E-01 | -1.61  E-01 |
| **Total area** | 4.06  E-05 | 3.32  E-05 | 2.18  E-05 | 1.65  E-05 | 1.73  E-05 | 2.15  E-05 | 2.78  E-05 | 6.92  E-06 | 7.91  E-06 | 8.09  E-06 | 7.78  E-06 | 7.24  E-06 | 6.62  E-06 | 6.01  E-06 | 1.53  E-04 | 1.61  E-04 | 1.48  E-04 | 1.36  E-04 | 1.29  E-04 | 1.26  E-04 | 1.26  E-04 |
| **Area Evenness** | 1.01  E+00 | 9.57  E-01 | 8.65  E-01 | 7.88  E-01 | 7.41  E-01 | 7.26  E-01 | 7.42  E-01 | -1.88  E-02 | -6.84  E-03 | -1.82  E-03 | 1.11  E-03 | 4.40  E-03 | 7.96  E-03 | 1.12  E-02 | 1.07  E+00 | 1.22  E+00 | 1.19  E+00 | 1.15  E+00 | 1.14  E+00 | 1.17  E+00 | 1.25  E+00 |
| **Minimum spanning tree** | 4.81  E-04 | 1.35  E-04 | 8.62  E-05 | 4.06  E-05 | 5.40  E-06 | 1.61  E-06 | -2.14  E-06 | -2.44  E-06 | 4.83  E-06 | 8.66  E-06 | 1.17  E-05 | 1.03  E-05 | 9.28  E-06 | 9.22  E-06 | 5.57  E-04 | 2.36  E-04 | 2.42  E-04 | 2.27  E-04 | 1.56  E-04 | 1.35  E-04 | 1.27  E-04 |
| **Clumping index** | 7.07  E+00 | 6.89  E+00 | 8.89  E+00 | 9.89  E+00 | 1.01  E+01 | 1.04  E+01 | 1.01  E+01 | -3.99  E-01 | -5.82  E-01 | -6.62  E-01 | -6.63  E-01 | -7.23  E-01 | -7.85  E-01 | -8.33  E-01 | 2.91  E+00 | 3.93  E-01 | 2.47  E+00 | 4.33  E+00 | 4.14  E+00 | 3.97  E+00 | 3.20  E+00 |
| **Alpha Habitat** | -4.03  E+00 | -2.10  E+00 | -1.47  E+00 | -1.01  E+00 | -6.93  E-01 | -2.39  E-01 | 1.03  E-01 | 2.24  E-01 | 1.67  E-01 | 1.44  E-01 | 1.35  E-01 | 7.32  E-02 | -5.73  E-02 | -2.34  E-01 | -2.59  E+00 | -1.10  E+00 | -5.96  E-01 | -6.82  E-02 | -5.05  E-01 | -1.73  E+00 | -3.76  E+00 |
| **Beta Habitat** | -1.46  E+01 | -7.70  E+00 | -5.46  E+00 | -3.89  E+00 | -2.96  E+00 | -1.80  E+00 | -1.07  E+00 | 4.16  E-01 | 1.61  E-01 | 4.52  E-02 | -1.37  E-02 | -2.22  E-01 | -6.35  E-01 | -1.18  E+00 | -1.46  E+01 | -1.02  E+01 | -8.91  E+00 | -7.53  E+00 | -9.20  E+00 | -1.35  E+01 | -2.02  E+01 |
| **Gamma Habitat** | 4.39  E+00 | 2.68  E+00 | 2.10  E+00 | 1.70  E+00 | 1.45  E+00 | 1.11  E+00 | 8.67  E-01 | -1.16  E-01 | -4.52  E-02 | -1.55  E-02 | -2.49  E-03 | 4.95  E-02 | 1.52  E-01 | 2.86  E-01 | 4.47  E+00 | 3.48  E+00 | 3.17  E+00 | 2.80  E+00 | 3.21  E+00 | 4.21  E+00 | 5.80  E+00 |
| **Alpha Prey** | 3.57  E+00 | 5.52  E-01 | -1.46  E+00 | -1.97  E+00 | -1.16  E+00 | 6.67  E-01 | 3.37  E+00 | -1.15  E-02 | -6.77  E-02 | -1.08  E-01 | -1.35  E-01 | -1.59  E-01 | -1.35  E-01 | -8.80  E-02 | 4.13  E+00 | -9.00  E-01 | -4.52  E+00 | -5.83  E+00 | -5.15  E+00 | -2.31  E+00 | 2.09  E+00 |
| **Beta Prey** | 1.37  E+01 | -3.25  E+00 | -1.39  E+01 | -1.69  E+01 | -1.35  E+01 | -5.68  E+00 | 5.77  E+00 | 4.94  E-01 | 3.03  E-01 | 1.56  E-01 | 5.15  E-02 | -4.77  E-02 | 7.16  E-02 | 2.79  E-01 | 2.29  E+01 | -3.45  E+00 | -2.16  E+01 | -2.83  E+01 | -2.56  E+01 | -1.34  E+01 | 5.25  E+00 |
| **Gamma Prey** | -2.12  E+00 | 6.11  E-01 | 2.35  E+00 | 2.75  E+00 | 2.03  E+00 | 4.58  E-01 | -1.84  E+00 | -5.48  E-03 | 4.50  E-02 | 7.90  E-02 | 1.00  E-01 | 1.19  E-01 | 9.69  E-02 | 5.48  E-02 | -2.50  E+00 | 2.10  E+00 | 5.24  E+00 | 6.30  E+00 | 5.67  E+00 | 3.21  E+00 | -5.52  E-01 |
| **LMG - explained variance** | | | | | | | | | | | | | | | | | | | | | |
| **Total number of samples** | 0.13 | 0.12 | 0.11 | 0.11 | 0.11 | 0.10 | 0.10 | 0.06 | 0.07 | 0.09 | 0.10 | 0.11 | 0.12 | 0.14 | 0.10 | 0.08 | 0.08 | 0.07 | 0.07 | 0.07 | 0.08 |
| **Total area** | 0.13 | 0.11 | 0.11 | 0.10 | 0.10 | 0.10 | 0.10 | 0.04 | 0.06 | 0.07 | 0.08 | 0.09 | 0.09 | 0.10 | 0.11 | 0.09 | 0.09 | 0.09 | 0.09 | 0.09 | 0.09 |
| **Area Evenness** | 0.02 | 0.04 | 0.05 | 0.07 | 0.09 | 0.11 | 0.13 | 0.01 | 0.01 | 0.01 | 0.01 | 0.01 | 0.01 | 0.02 | 0.02 | 0.03 | 0.05 | 0.06 | 0.08 | 0.11 | 0.14 |
| **Minimum spanning tree** | 0.02 | 0.02 | 0.02 | 0.02 | 0.02 | 0.02 | 0.01 | 0.01 | 0.02 | 0.03 | 0.05 | 0.07 | 0.08 | 0.11 | 0.01 | 0.01 | 0.01 | 0.01 | 0.01 | 0.01 | 0.02 |
| **Clumping index** | 0.06 | 0.07 | 0.09 | 0.09 | 0.09 | 0.09 | 0.08 | 0.05 | 0.05 | 0.04 | 0.03 | 0.03 | 0.03 | 0.03 | 0.03 | 0.04 | 0.05 | 0.06 | 0.06 | 0.06 | 0.06 |
| **Alpha Habitat** | 0.06 | 0.06 | 0.06 | 0.06 | 0.06 | 0.06 | 0.06 | 0.04 | 0.05 | 0.04 | 0.04 | 0.03 | 0.03 | 0.03 | 0.10 | 0.11 | 0.11 | 0.11 | 0.11 | 0.11 | 0.11 |
| **Beta Habitat** | 0.01 | 0.01 | 0.01 | 0.01 | 0.01 | 0.02 | 0.02 | 0.01 | 0.02 | 0.02 | 0.02 | 0.02 | 0.02 | 0.02 | 0.01 | 0.02 | 0.02 | 0.02 | 0.02 | 0.02 | 0.02 |
| **Gamma Habitat** | 0.05 | 0.04 | 0.04 | 0.04 | 0.04 | 0.03 | 0.03 | 0.04 | 0.05 | 0.04 | 0.04 | 0.04 | 0.03 | 0.03 | 0.08 | 0.08 | 0.08 | 0.08 | 0.08 | 0.08 | 0.08 |
| **Alpha Prey** | 0.14 | 0.15 | 0.16 | 0.17 | 0.16 | 0.16 | 0.15 | 0.08 | 0.09 | 0.09 | 0.09 | 0.10 | 0.10 | 0.11 | 0.09 | 0.10 | 0.10 | 0.10 | 0.09 | 0.09 | 0.08 |
| **Beta Prey** | 0.02 | 0.03 | 0.05 | 0.06 | 0.07 | 0.08 | 0.10 | 0.10 | 0.13 | 0.14 | 0.16 | 0.17 | 0.17 | 0.17 | 0.01 | 0.01 | 0.01 | 0.01 | 0.01 | 0.02 | 0.02 |
| **Gamma Prey** | 0.12 | 0.12 | 0.12 | 0.11 | 0.10 | 0.10 | 0.09 | 0.04 | 0.04 | 0.04 | 0.04 | 0.04 | 0.04 | 0.04 | 0.10 | 0.10 | 0.10 | 0.10 | 0.09 | 0.08 | 0.06 |
